# Supplementary material for: Anticancer SAR establishment and α/β-tubulin isoform specific targeting: a detailed insight of the anticancer potential of 4H-chromene derivatives
Source: Royal Society of Chemistry journal article supplement (doi:10.1039/d2nj04822a), 2023-01-01
Supplement: d2nj04822a1.pdf [file d2nj04822a1.pdf]

## Supporting Information

Mayank,<sup>a,b\*</sup> Ashutosh Singh,<sup>c</sup> Kumar Udit Saumya,<sup>c</sup> Mayank Joshi,<sup>d</sup> Navneet Kaur,<sup>e\*</sup> Neha Garg,<sup>c,f\*</sup>, Narinder Singh<sup>a\*</sup>

<sup>a</sup>Department of Chemistry, Indian Institute of Technology Ropar, Punjab 140001, India,  
[nsingh@iitrpr.ac.in](mailto:nsingh@iitrpr.ac.in)

<sup>b</sup>University College of Pharmacy and Guru Kashi University, Talwandi Sabo  
[mayank6103@gmail.com](mailto:mayank6103@gmail.com)

<sup>c</sup> School of Basic Sciences, Indian Institute of Technology Mandi, Himachal Pradesh 175005, India,

<sup>d</sup>M. M. College of Pharmacy, Maharishi Markandeshwar (Deemed to be University), Mullana, Ambala, Haryana, 133207, India.

<sup>e</sup>Department of Chemistry, Punjab University, Chandigarh, 160014, India.  
[navneetkaur@pu.ac.in](mailto:navneetkaur@pu.ac.in)

<sup>f</sup>Department of Medicinal Chemistry, Faculty of Ayurveda, Institute of Medical Sciences, Banaras Hindu University, Varanasi, Uttar Pradesh-221005, India.  
[nehagarg@bhu.ac.in](mailto:nehagarg@bhu.ac.in)

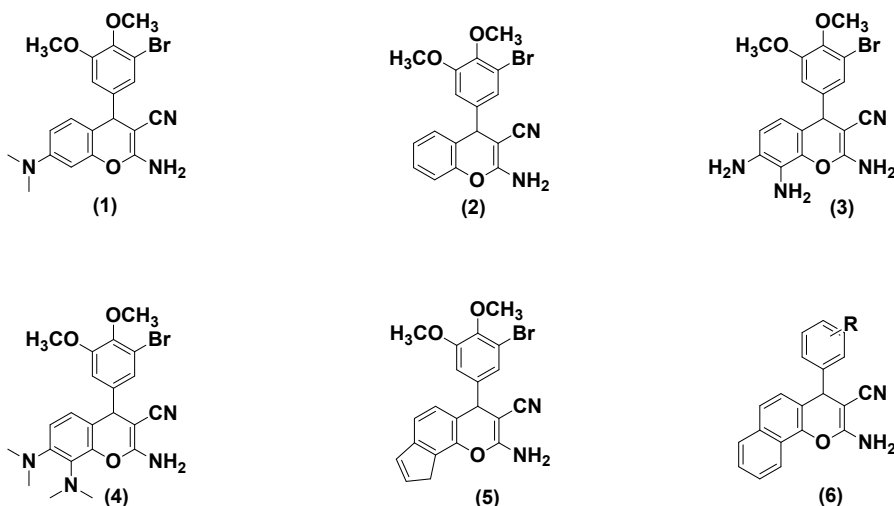

**Figure SF 1.**(1) Structure of MX-58151 (1); (2-5) other compounds of the MX-58151 series reported to binding colchicine binding site of  $\alpha/\beta$  tubulin isoforms and (6)Basic scaffold of 2-amino-4-phenyl-4H-benzo[h]chromene-3-carbonitrile derivatives used in our studies.

## Synthesis of chromene derivatives

The reaction scheme for the synthesis of chromene derivatives is as represented in figure SF1. Many methods for the synthesis of chromene derivatives are available in literature.<sup>1-3</sup> Herein, for the synthesis of chromene derivatives, one equivalent of each  $\alpha$ -Naphthol, malononitrile, and aldehyde derivatives was refluxed in methanol for 6 hrs. Few drops of triethylamine were used as a catalyst and after completion of the reaction, the products were purified by recrystallizing using methanol as a solvent. The structural features of the synthesized compounds are represented in figure SF2 below. The characterization of the synthesized compounds was done by  $^1\text{H}$  NMR spectroscopic and mass spectrometric technique. The characterization data of the compounds were provided in figure SF3-SF14 below. Other methods for the synthesis of chromene derivatives are also reported

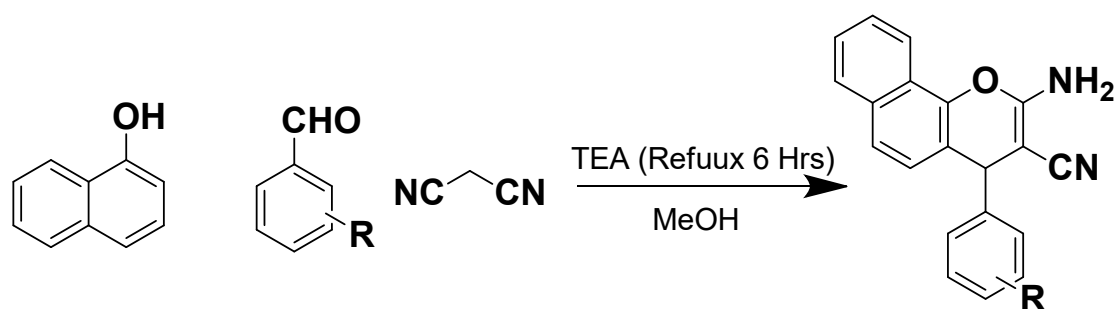

Figure SF2. Structure of chromene derivatives used in the study

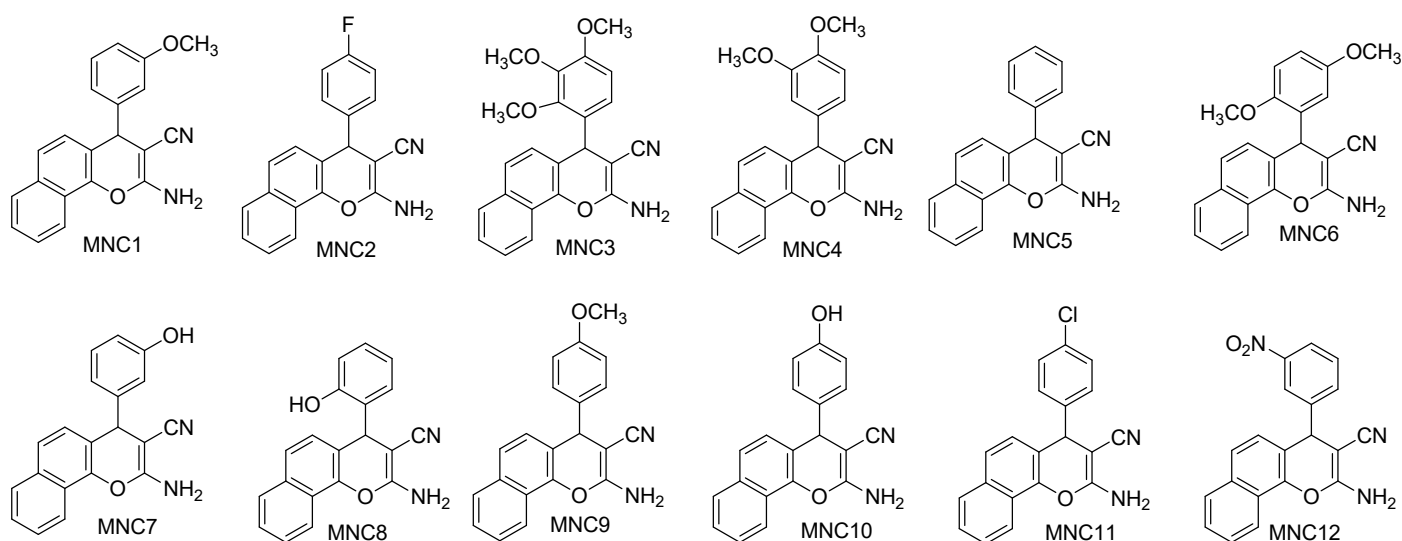

Figure SF3. Structure of chromene derivatives used in the study

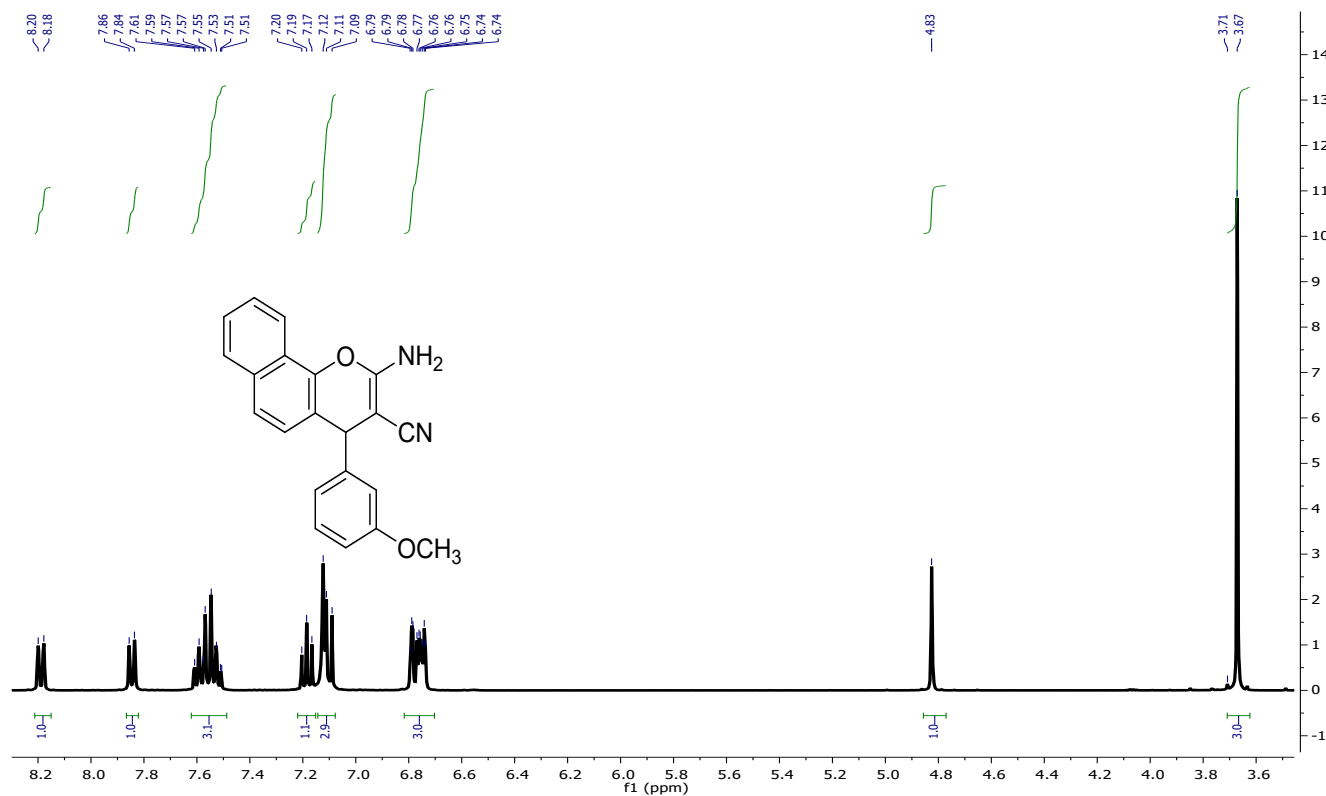

Test Name : HRMS-1  
 070319-MN-NAP-3-OMe 13 (0.140) AM (Top,4, Ar,10000.0,0.00,0.00); Cm (13:18)

1: TOF MS ES+  
 1.01e+008

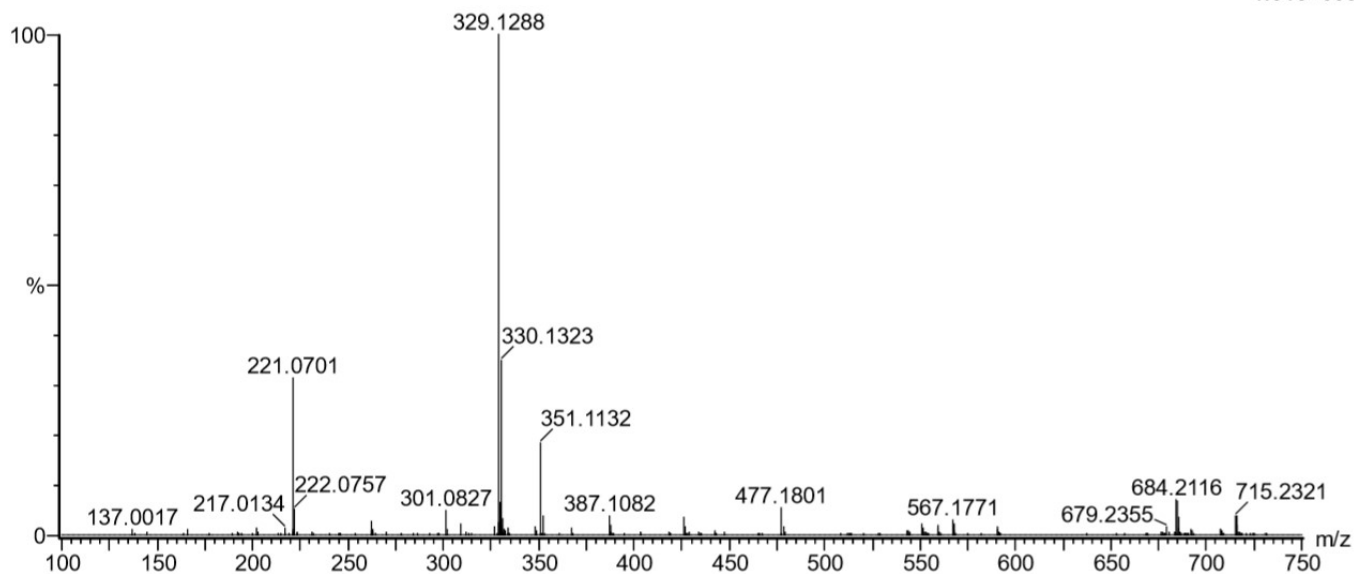

Minimum: -1.5  
 Maximum: 5.0 10.0 50.0

| Mass     | Calc. Mass | mDa  | PPM  | DBE  | i-FIT  | Norm | Conf (%) | Formula       |
|----------|------------|------|------|------|--------|------|----------|---------------|
| 329.1288 | 329.1290   | -0.2 | -0.6 | 14.5 | 1105.1 | n/a  | n/a      | C21 H17 N2 O2 |

Figure SF4. <sup>1</sup>H NMR and HRMS of MNC-1 used in the study, (For HRMS m/z: [M+H]<sup>+</sup> calcd for C<sub>21</sub>H<sub>16</sub>N<sub>2</sub>O<sub>2</sub><sup>+</sup> 329.12; found 329.1288)

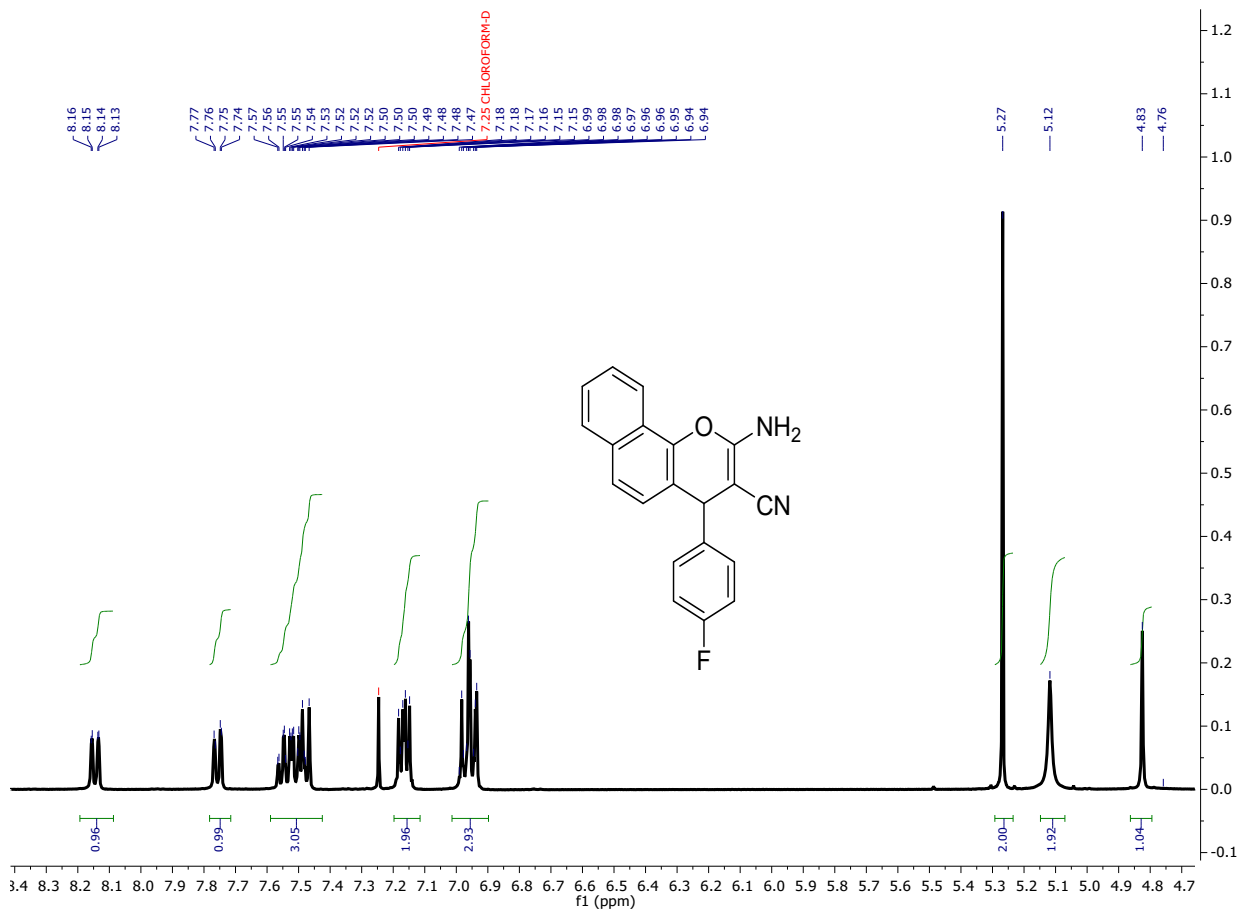

Test Name : HRMS-1  
 070319-MN-NAP-4-F 16 (0.165) AM2 (Ar,22000.0,0.00,0.00); Cm (16:19)

1: TOF MS ES+  
 4.73e+007

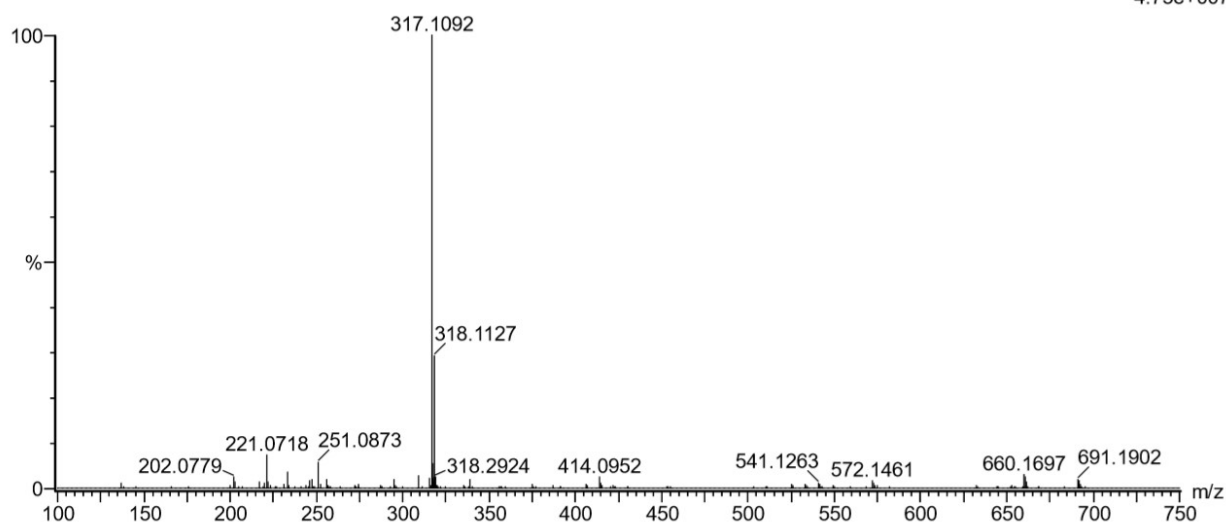

Minimum: -1.5  
 Maximum: 5.0 5.0 50.0

| Mass     | Calc. Mass | mDa | PPM | DBE  | i-FIT | Norm | Conf (%) | Formula        |
|----------|------------|-----|-----|------|-------|------|----------|----------------|
| 317.1092 | 317.1090   | 0.2 | 0.6 | 14.5 | 847.2 | n/a  | n/a      | C20 H14 N2 O F |

Figure SF5. <sup>1</sup>H NMR and HRMS of MNC-2 used in the study, (For HRMS m/z: [M+H]<sup>+</sup> calcd for C<sub>20</sub>H<sub>13</sub>FN<sub>2</sub>O<sup>+</sup> 317.10; found 317.1092)

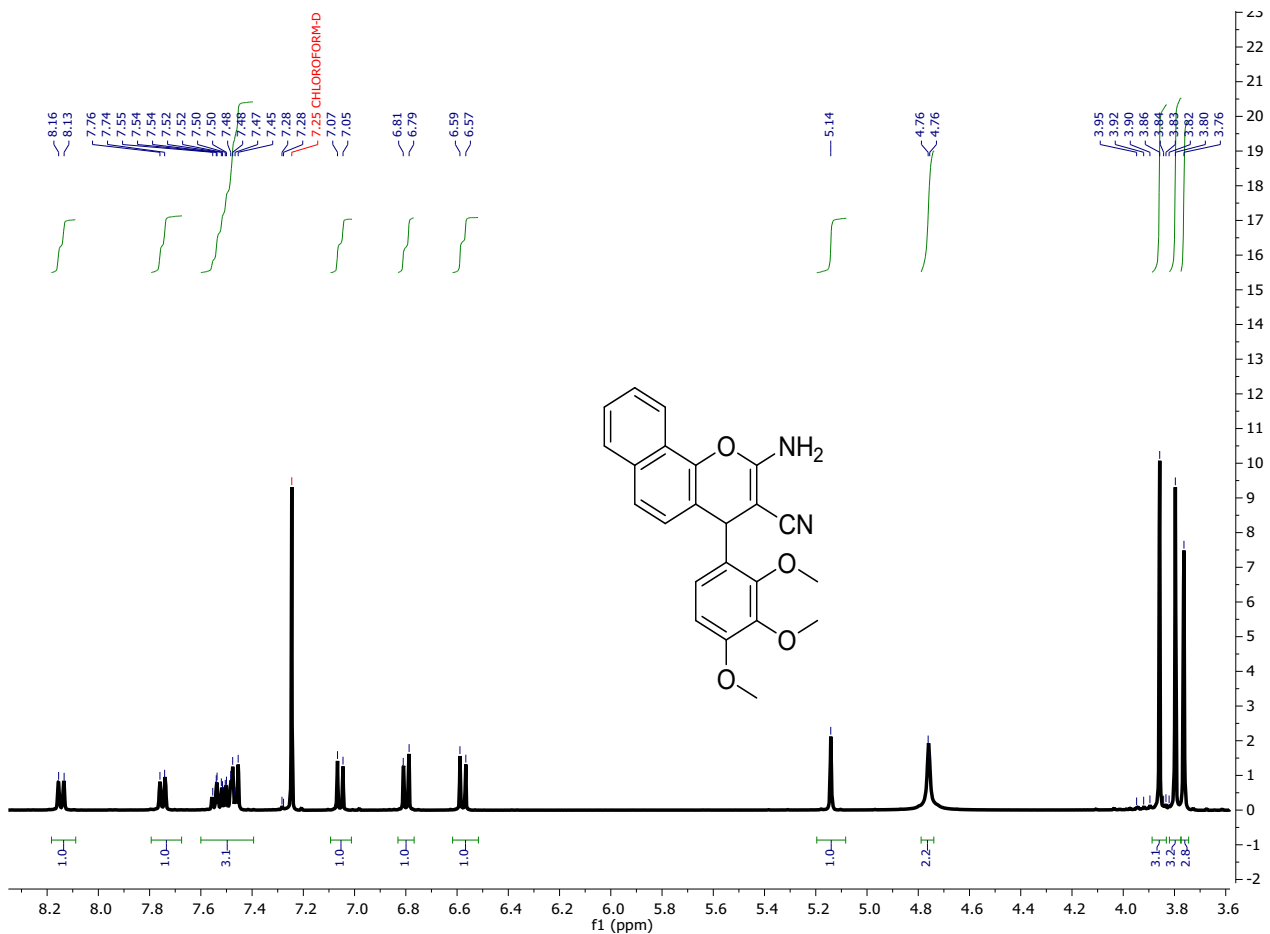

Test Name : HRMS-1  
 070319-MN-NAP-2-3-4-OMe 18 (0.183) AM2 (Ar,22000.0,0.00,0.00); Cm (18:20)

1: TOF MS ES+  
 2.95e+007

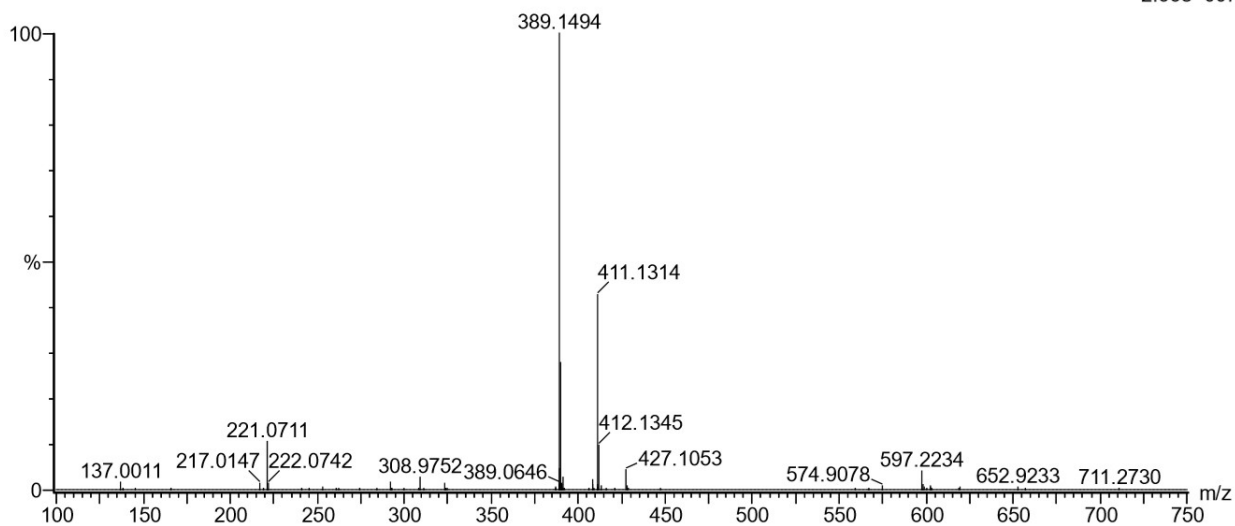

Minimum: -1.5  
 Maximum: 5.0 10.0 50.0

| Mass     | Calc. Mass | mDa  | PPM  | DBE  | i-FIT | Norm | Conf (%) | Formula       |
|----------|------------|------|------|------|-------|------|----------|---------------|
| 389.1494 | 389.1501   | -0.7 | -1.8 | 14.5 | 656.9 | n/a  | n/a      | C23 H21 N2 O4 |

Figure SF6. <sup>1</sup>H NMR and HRMS of MNC-3 used in the study, (For HRMS m/z: [M+H]<sup>+</sup> calcd for C<sub>23</sub>H<sub>20</sub>N<sub>2</sub>O<sub>4</sub><sup>+</sup> 389.14; found 389.1494)

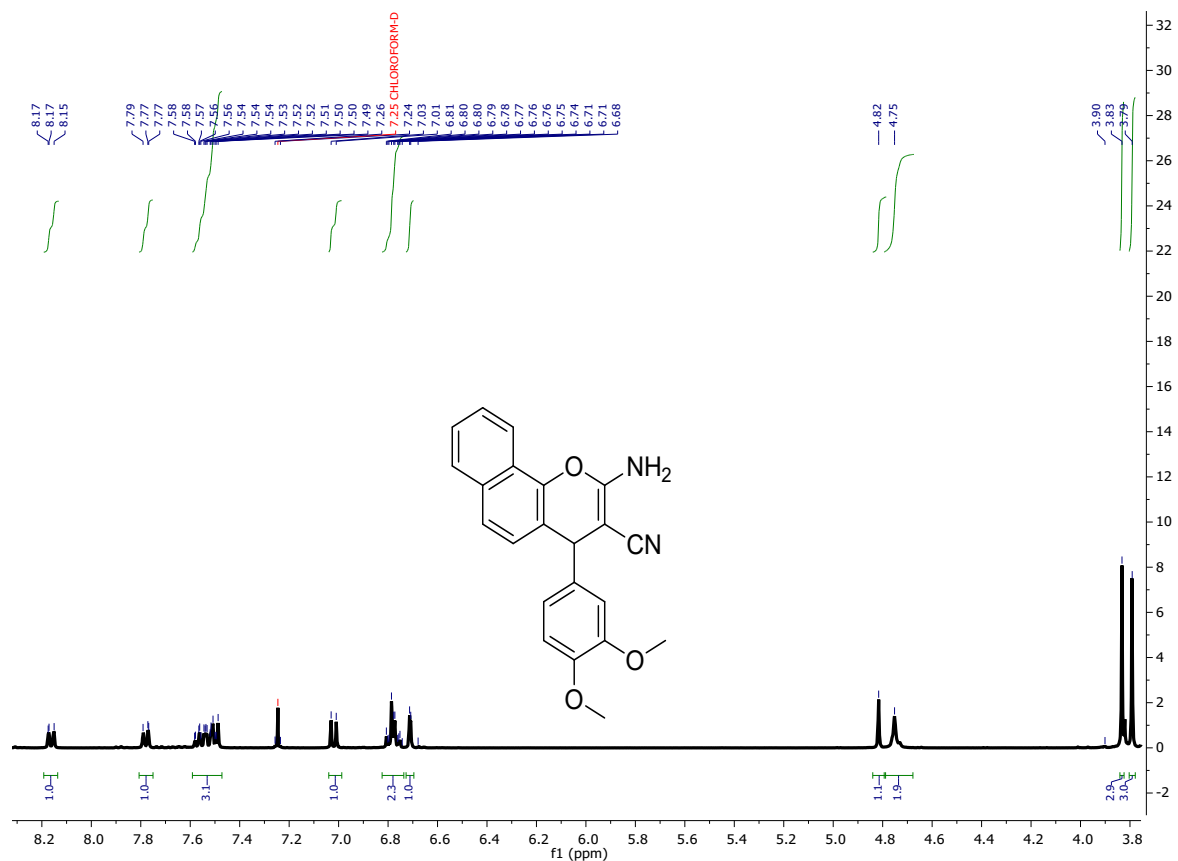

Test Name : HRMS-1  
 070319-MN-NAP-3-4-OMe 18 (0.183) AM2 (Ar,22000.0,0.00,0.00); Cm (18:22)

1: TOF MS ES+  
 2.41e+007

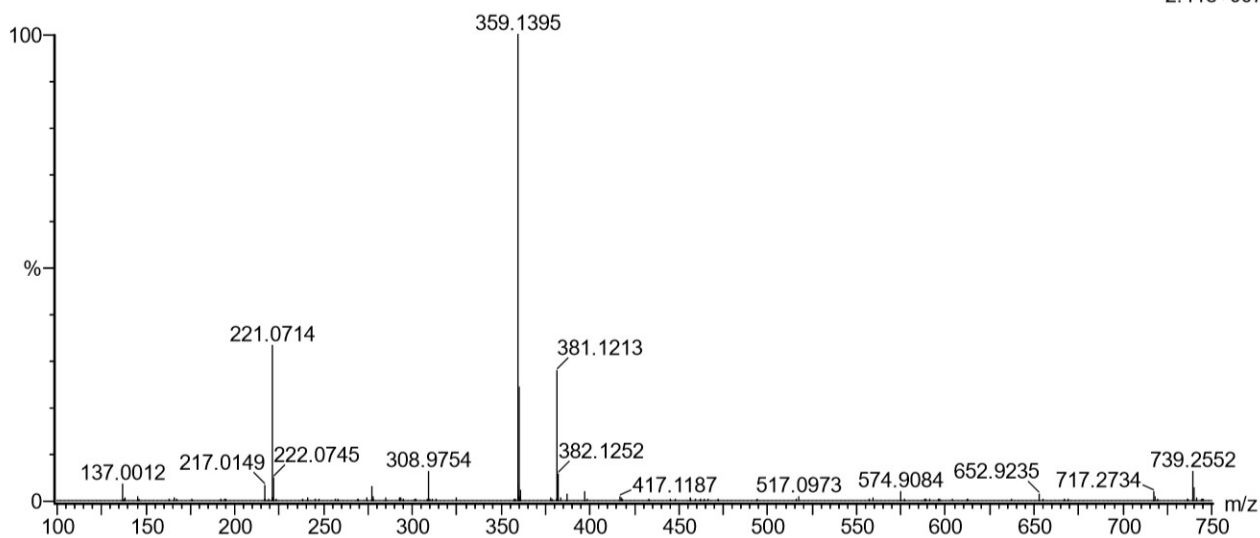

Minimum: -1.5  
 Maximum: 5.0 10.0 50.0

| Mass     | Calc. Mass | mDa  | PPM  | DBE  | i-FIT | Norm | Conf (%) | Formula       |
|----------|------------|------|------|------|-------|------|----------|---------------|
| 359.1395 | 359.1396   | -0.1 | -0.3 | 14.5 | 674.0 | n/a  | n/a      | C22 H19 N2 O3 |

Figure SF7. <sup>1</sup>H NMR and HRMS of MNC-4 used in the study, (For HRMS m/z: [M+H]<sup>+</sup> calcd for C<sub>22</sub>H<sub>18</sub>N<sub>2</sub>O<sub>2</sub><sup>+</sup> 359.13; found 359.1395)

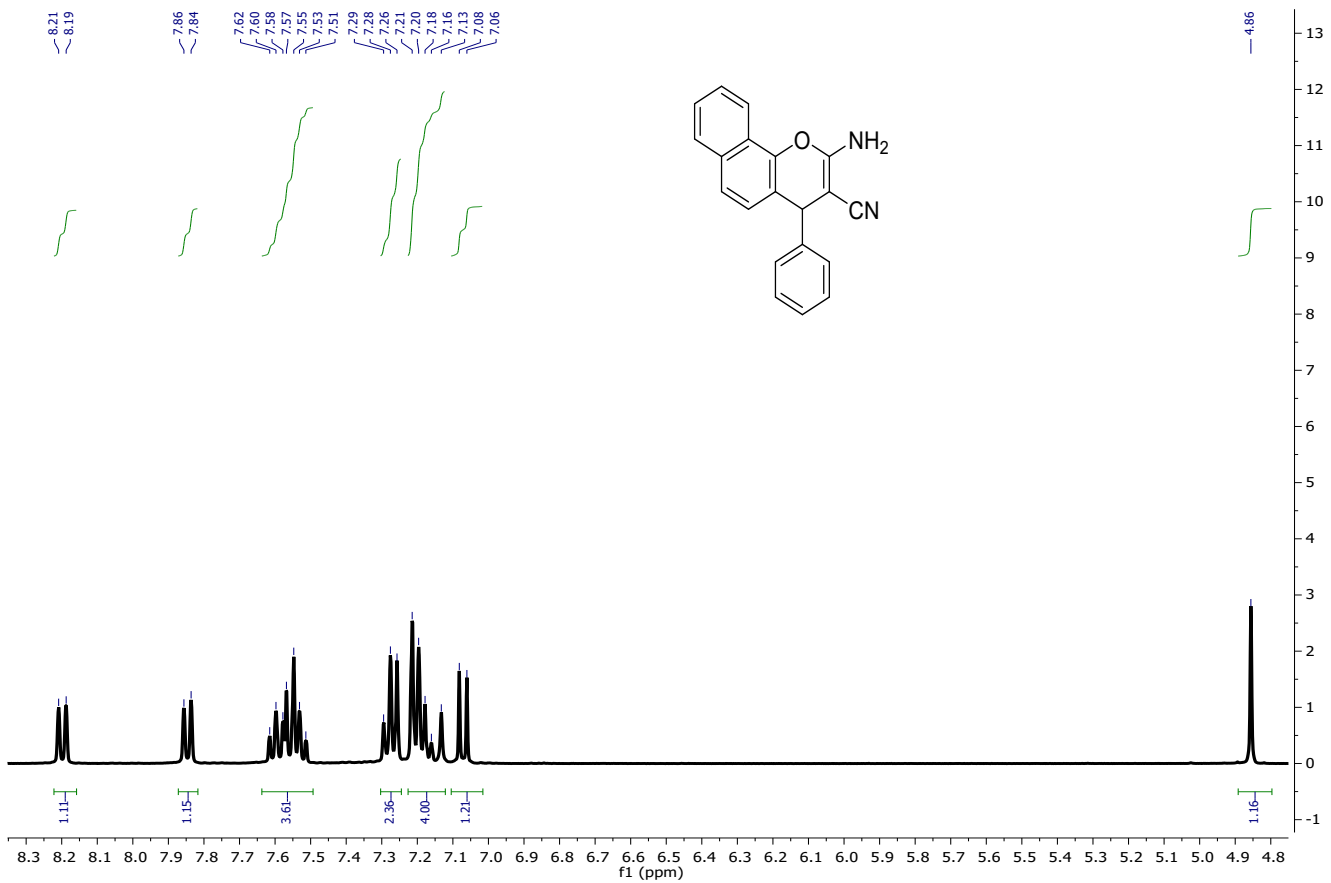

Test Name : HRMS-1  
 070319-MN-NAP-BENZ 17 (0.174) AM (Top,4, Ar,10000.0,0.00,0.00); Cm (17:19)

1: TOF MS ES+  
 1.91e+007

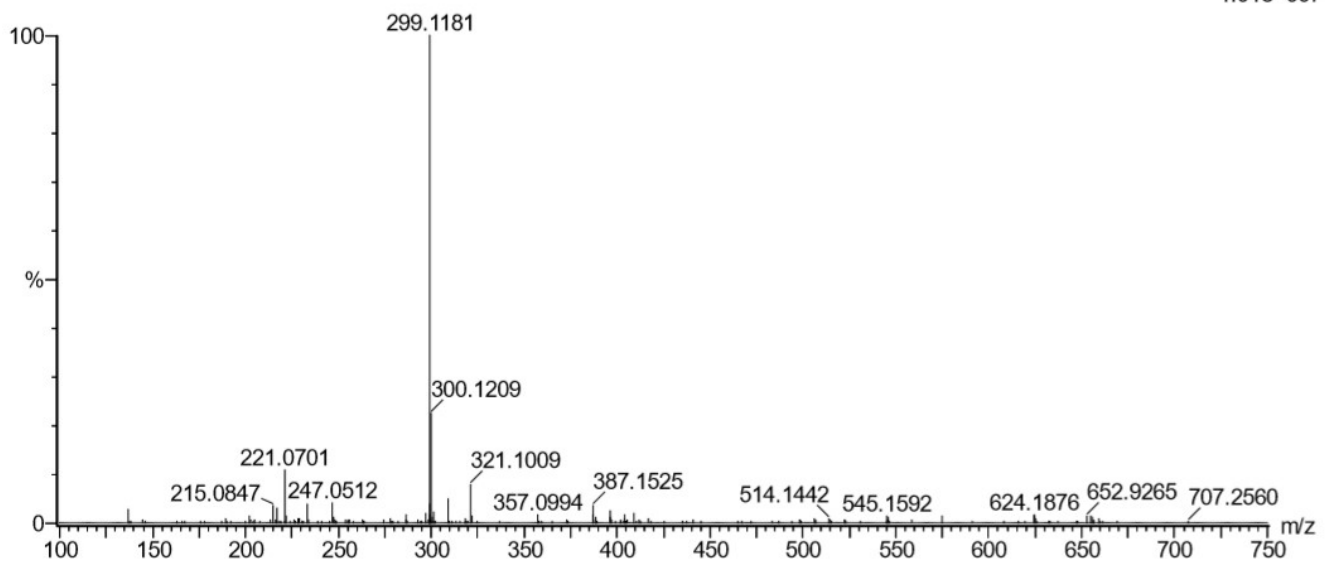

Minimum: -1.5  
 Maximum: 5.0 10.0 50.0

| Mass     | Calc. Mass | mDa  | PPM  | DBE  | i-FIT | Norm | Conf (%) | Formula                                          |
|----------|------------|------|------|------|-------|------|----------|--------------------------------------------------|
| 299.1181 | 299.1184   | -0.3 | -1.0 | 14.5 | 753.6 | n/a  | n/a      | C <sub>20</sub> H <sub>15</sub> N <sub>2</sub> O |

Figure SF8. <sup>1</sup>H NMR and HRMS of MNC-5 used in the study, (For HRMS m/z: [M+H]<sup>+</sup> calcd for C<sub>20</sub>H<sub>14</sub>N<sub>2</sub>O<sup>+</sup> 299.11; found 299.1181)

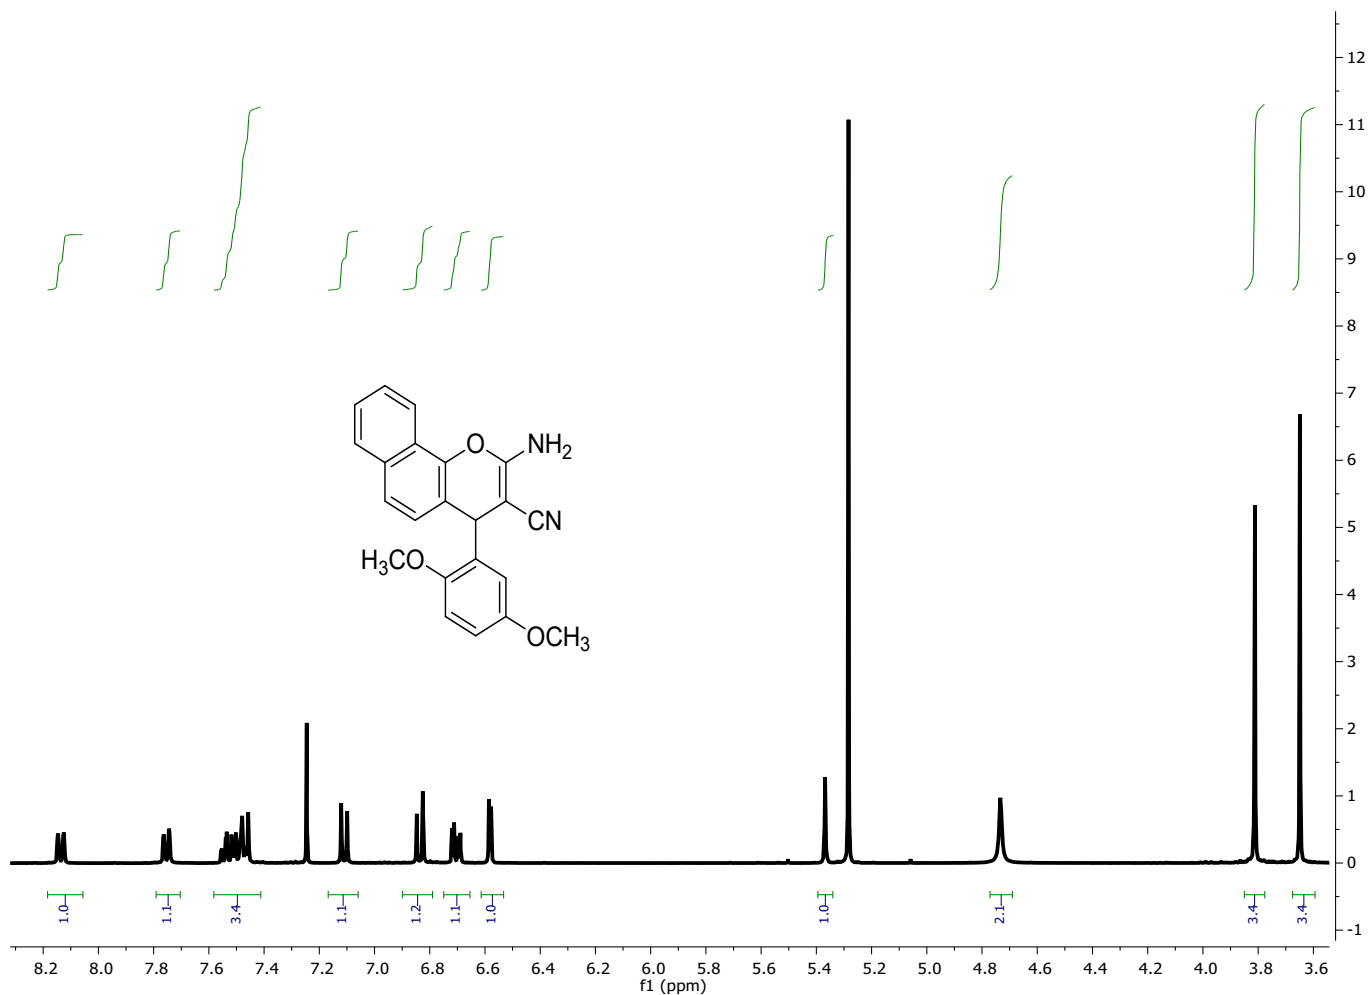

Test Name : HRMS-1  
 070319-MN-NAP-2-5-OCH3 17 (0.174) AM2 (Ar,22000.0,0.00,0.00); Cm (17:20)

1: TOF MS ES+  
 3.18e+007

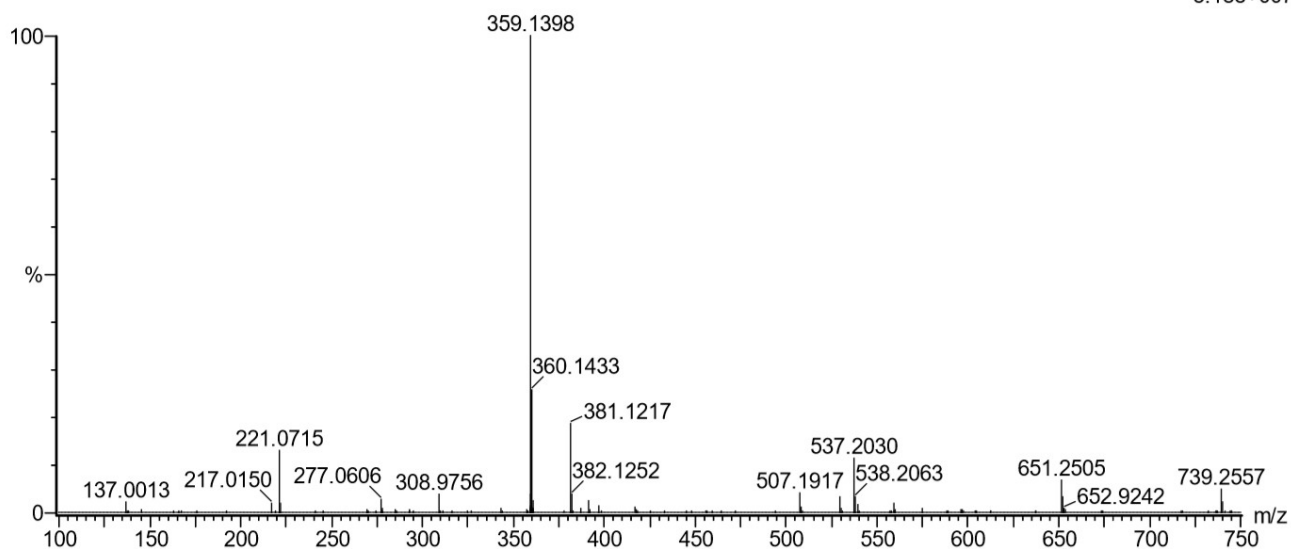

Minimum: -1.5  
 Maximum: 5.0 10.0 50.0

| Mass     | Calc. Mass | mDa | PPM | DBE  | i-FIT | Norm | Conf (%) | Formula       |
|----------|------------|-----|-----|------|-------|------|----------|---------------|
| 359.1398 | 359.1396   | 0.2 | 0.6 | 14.5 | 735.2 | n/a  | n/a      | C22 H19 N2 O3 |

Figure SF9. <sup>1</sup>H NMR and HRMS of MNC-6 used in the study, (For HRMS m/z: [M+H]<sup>+</sup> calcd for C<sub>22</sub>H<sub>18</sub>N<sub>2</sub>O<sub>3</sub><sup>+</sup> 359.13; found 359.1398)



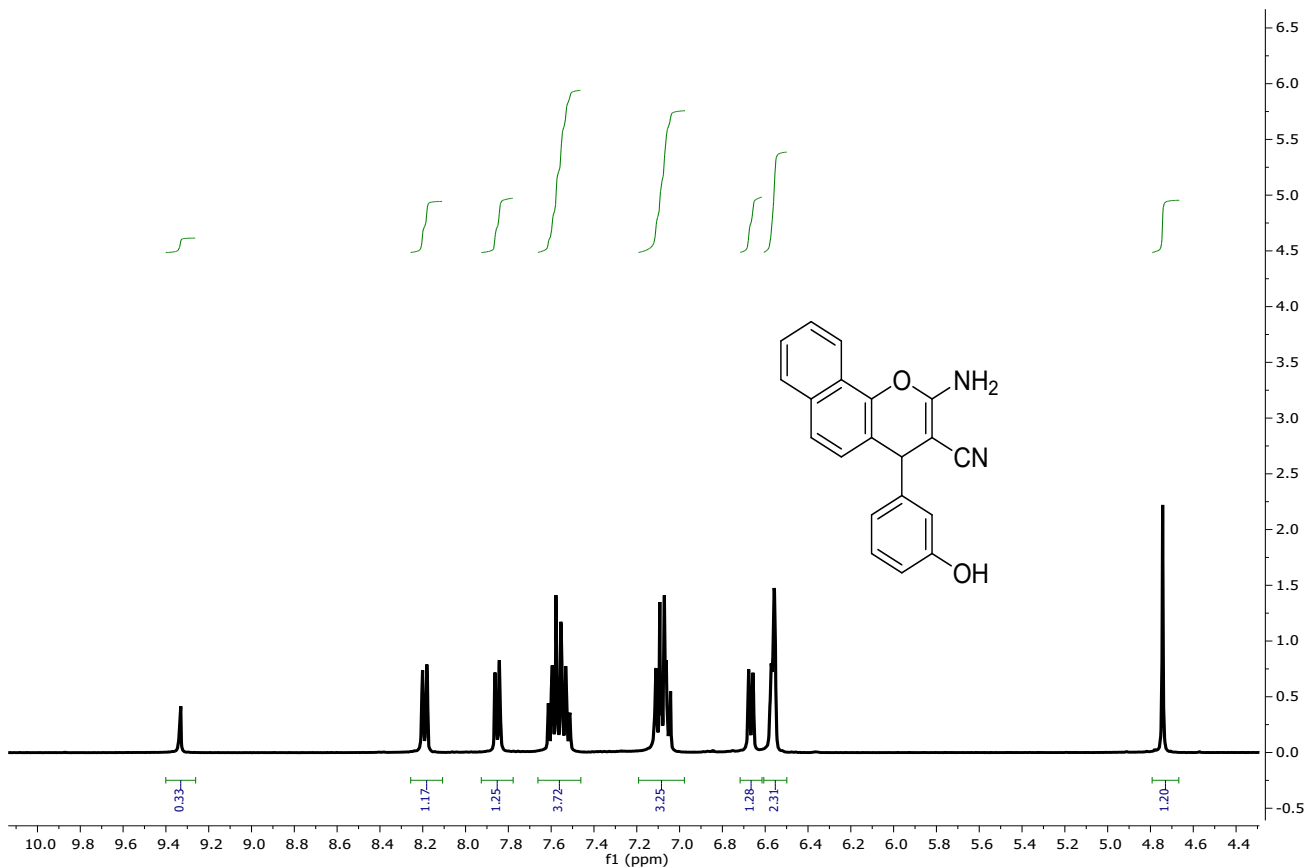

Test Name : HRMS-1  
 070319-MN-NAP-3-OH 16 (0.165) AM2 (Ar,22000.0,0.00,0.00); Cm (16:19)

1: TOF MS ES+  
 4.47e+007

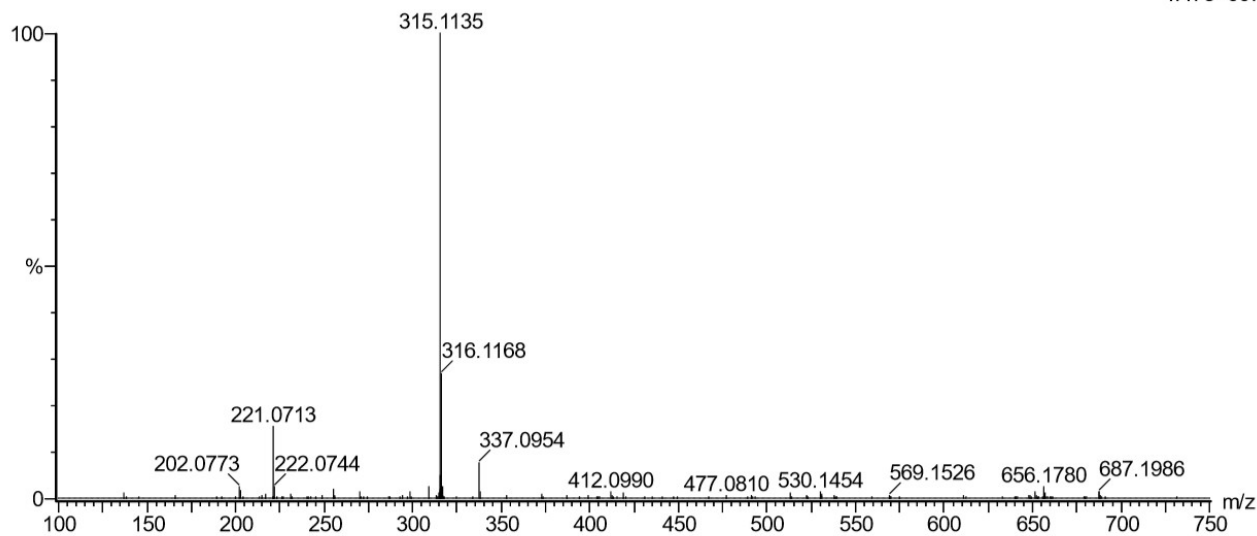

Minimum: -1.5  
 Maximum: 5.0 10.0 50.0

| Mass     | Calc. Mass | mDa | PPM | DBE  | i-FIT | Norm | Conf (%) | Formula                                                       |
|----------|------------|-----|-----|------|-------|------|----------|---------------------------------------------------------------|
| 315.1135 | 315.1134   | 0.1 | 0.3 | 14.5 | 783.1 | n/a  | n/a      | C <sub>20</sub> H <sub>15</sub> N <sub>2</sub> O <sub>2</sub> |

Figure SF10. <sup>1</sup>H NMR and HRMS of MNC-7 used in the study (For HRMS m/z: [M+H]<sup>+</sup> calcd for C<sub>20</sub>H<sub>14</sub>N<sub>2</sub>O<sub>2</sub><sup>+</sup> 315.11; found 315.1135)

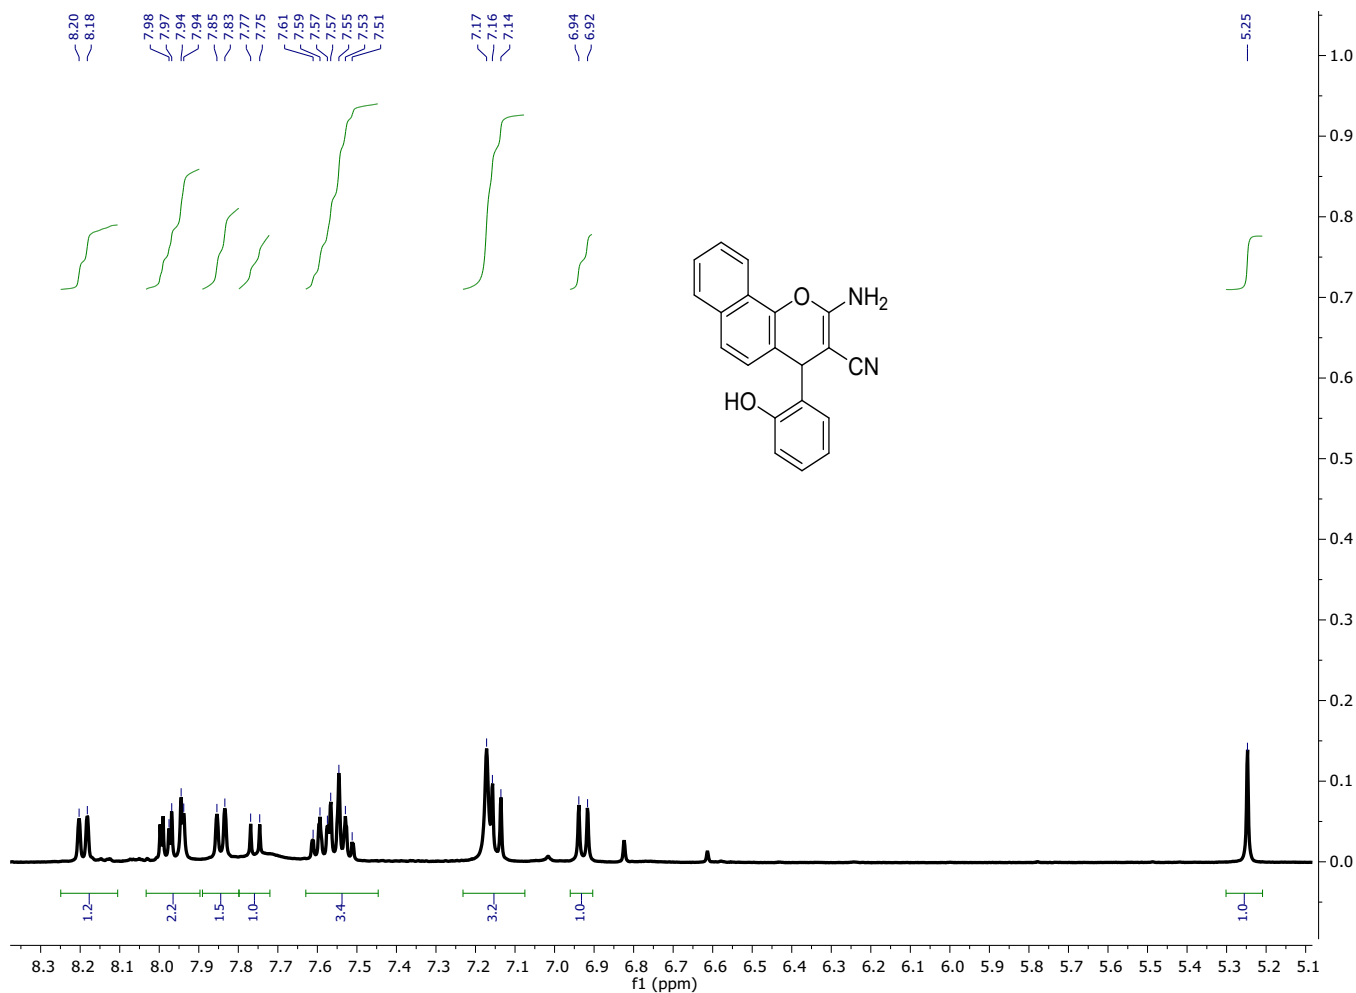

Test Name : HRMS-1

250419-MN-Chr-2-OH 27 (0.271) AM (Cen,4, 85.00, Ar,10000.0,0.00,0.00); Sm (SG, 1x3.00); Cm (27:43)

1: TOF MS ES+  
1.63e+008

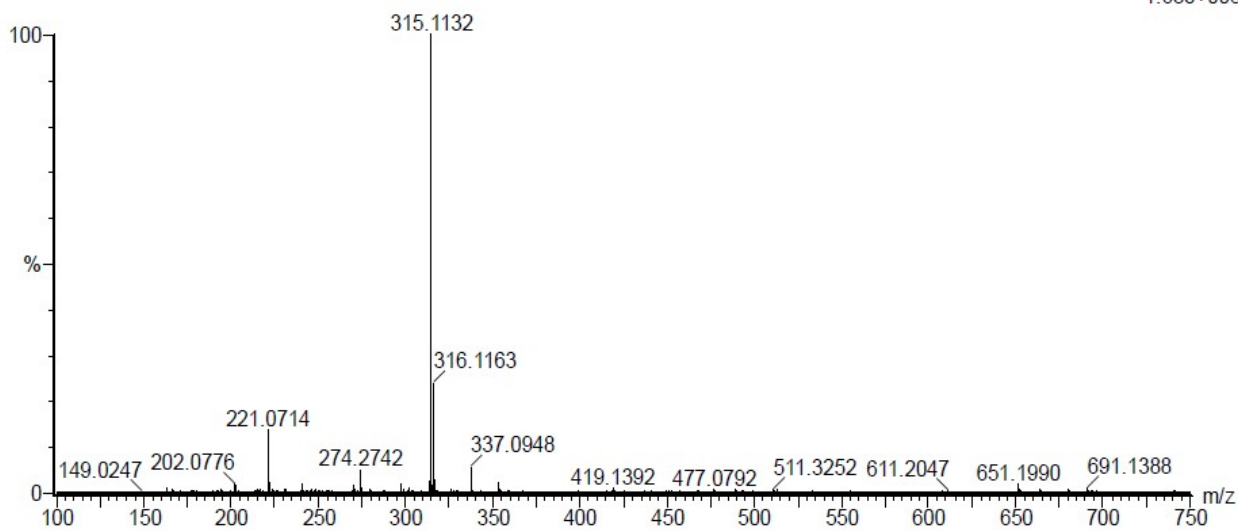

Minimum: -1.5  
Maximum: 5.0 5.0 50.0

| Mass     | Calc. Mass | mDa  | PPM  | DBE  | i-FIT | Norm | Conf(%) | Formula                                                       |
|----------|------------|------|------|------|-------|------|---------|---------------------------------------------------------------|
| 315.1132 | 315.1134   | -0.2 | -0.6 | 14.5 | 984.4 | n/a  | n/a     | C <sub>20</sub> H <sub>15</sub> N <sub>2</sub> O <sub>2</sub> |

Figure SF11. <sup>1</sup>H NMR of MNC-8 used in the study (For HRMS m/z: [M+H]<sup>+</sup> calcd for C<sub>20</sub>H<sub>14</sub>N<sub>2</sub>O<sub>2</sub><sup>+</sup> 315.34; found 315.1132)

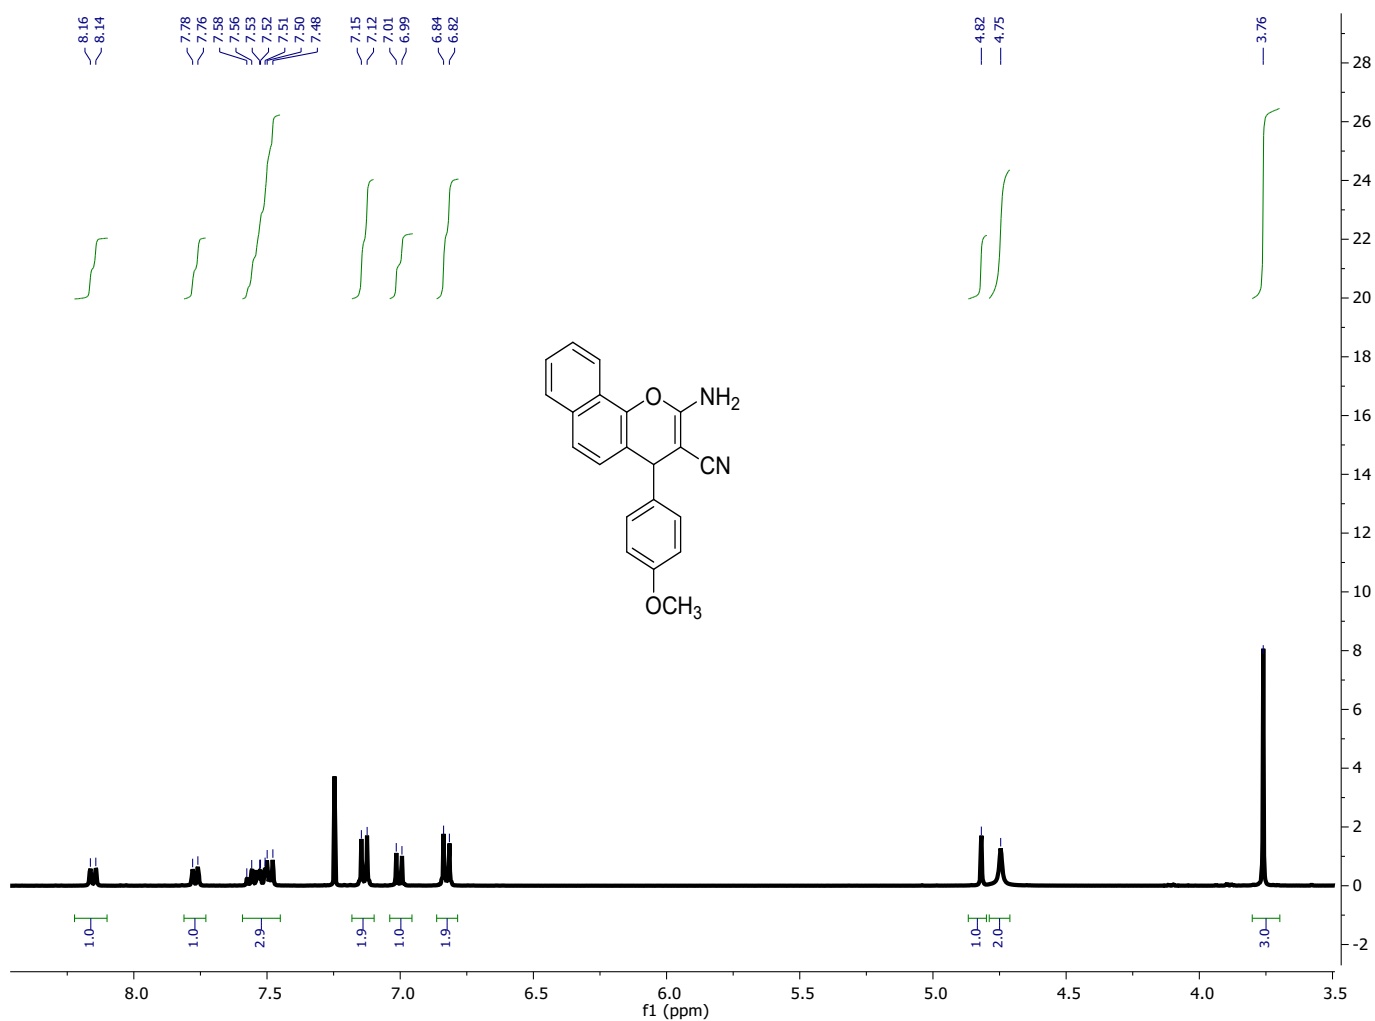

Test Name : HRMS-1  
 250419-MN-Chr-4-OCH3 33 (0.323) AM (Cen,4, 85.00, Ar,10000.0,0.00,0.00); Sm (SG, 1x3.00); Cm (33:43)

1: TOF MS ES+  
 7.71e+007

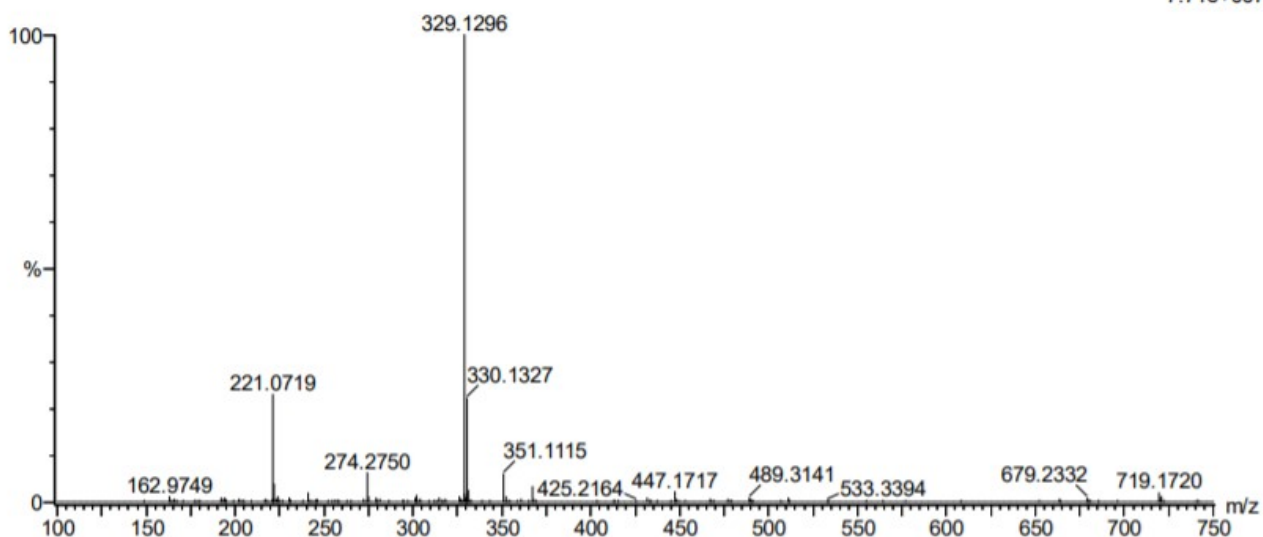

Minimum: -1.5  
 Maximum: 5.0 5.0 50.0

| Mass     | Calc. Mass | mDa | PPM | DBE  | i-FIT | Norm | Conf(%) | Formula                                                       |
|----------|------------|-----|-----|------|-------|------|---------|---------------------------------------------------------------|
| 329.1296 | 329.1290   | 0.6 | 1.8 | 14.5 | 956.4 | n/a  | n/a     | C <sub>21</sub> H <sub>17</sub> N <sub>2</sub> O <sub>2</sub> |

Figure SF12. <sup>1</sup>H NMR of MNC-9 used in the study, (For HRMS m/z: [M+H]<sup>+</sup> calcd for C<sub>21</sub>H<sub>16</sub>N<sub>2</sub>O<sub>2</sub><sup>+</sup> 339.120; found 329.1296)

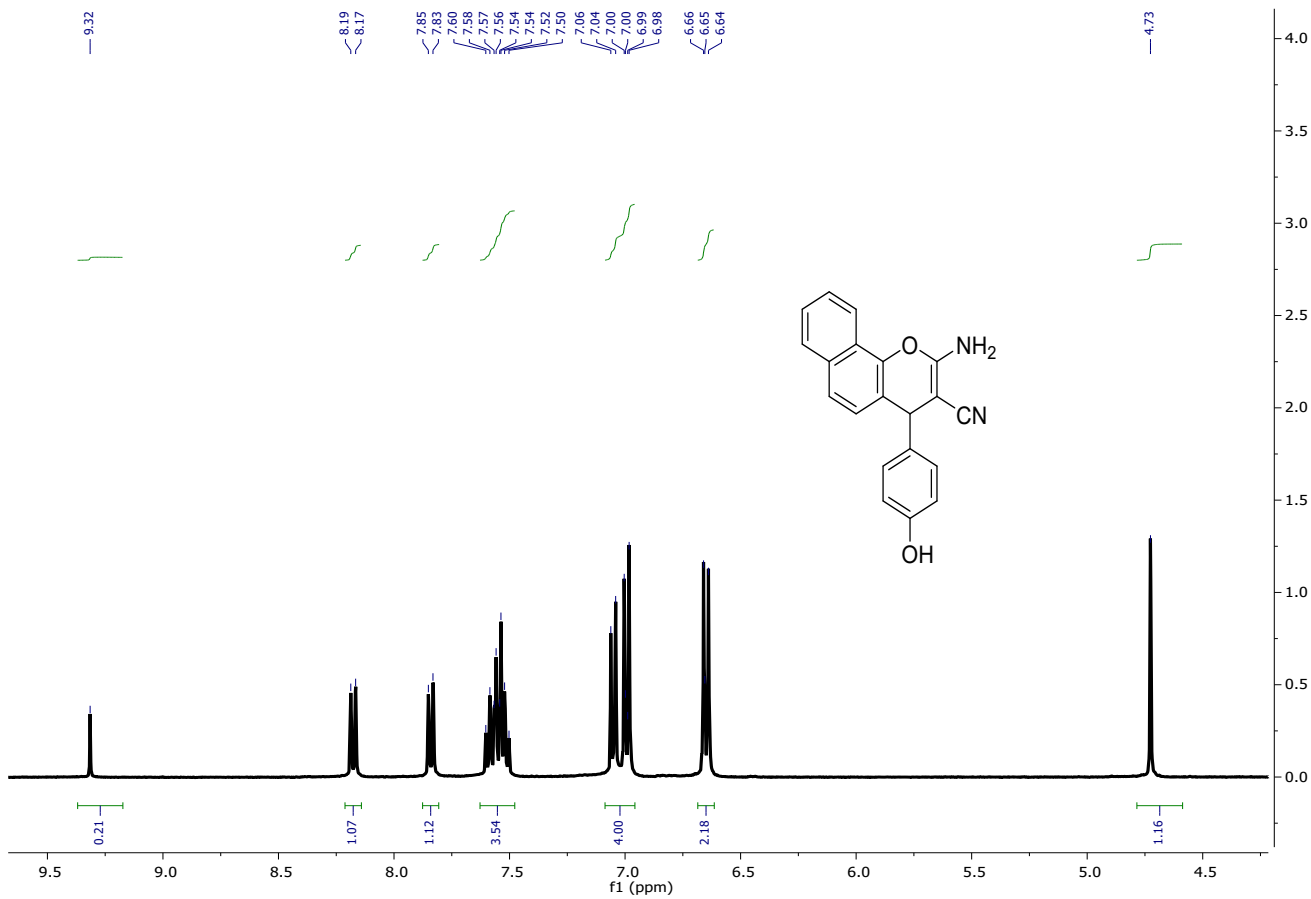

070319-MN-NAP-4-OH- 17 (0.174) AM2 (Ar,22000.0,0.00,0.00); Cm (17:18)

1: TOF MS ES+  
1.39e+007

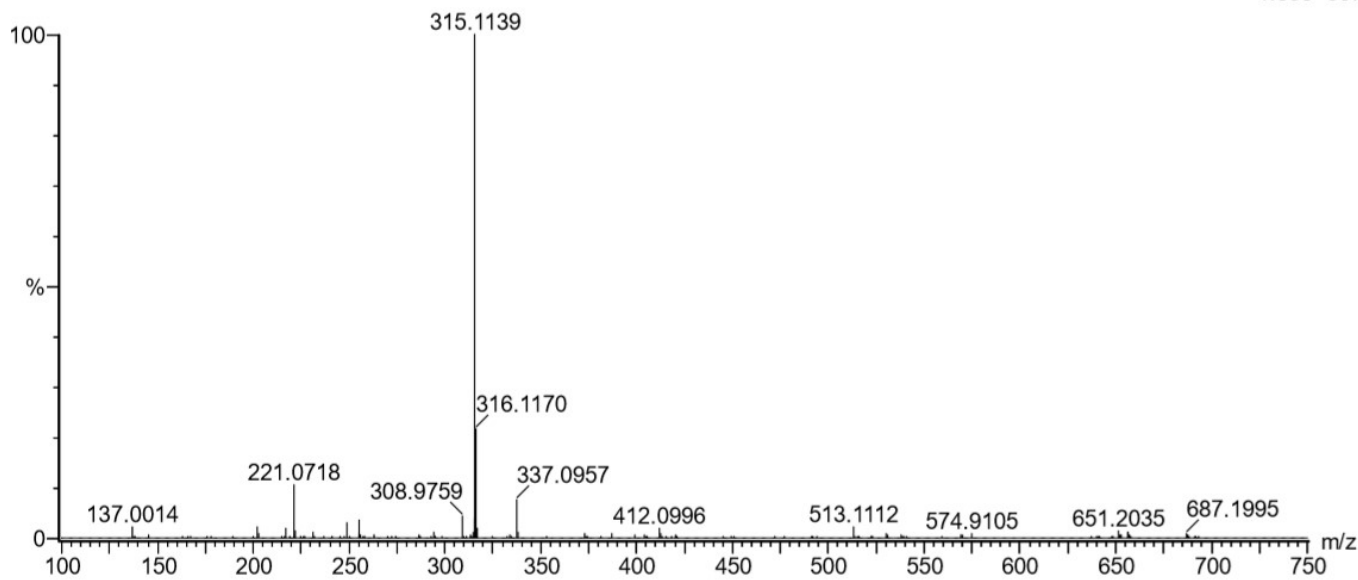

Minimum: -1.5  
Maximum: 5.0 10.0 50.0

| Mass     | Calc. Mass | mDa | PPM | DBE  | i-FIT | Norm | Conf (%) | Formula                                                       |
|----------|------------|-----|-----|------|-------|------|----------|---------------------------------------------------------------|
| 315.1139 | 315.1134   | 0.5 | 1.6 | 14.5 | 715.4 | n/a  | n/a      | C <sub>20</sub> H <sub>15</sub> N <sub>2</sub> O <sub>2</sub> |

Figure SF13. <sup>1</sup>H NMR and HRMS of MNC-10 used in the study, (For HRMS m/z: [M+H]<sup>+</sup> calcd for C<sub>20</sub>H<sub>14</sub>N<sub>2</sub>O<sub>2</sub><sup>+</sup> 315.110; found 315.1139)

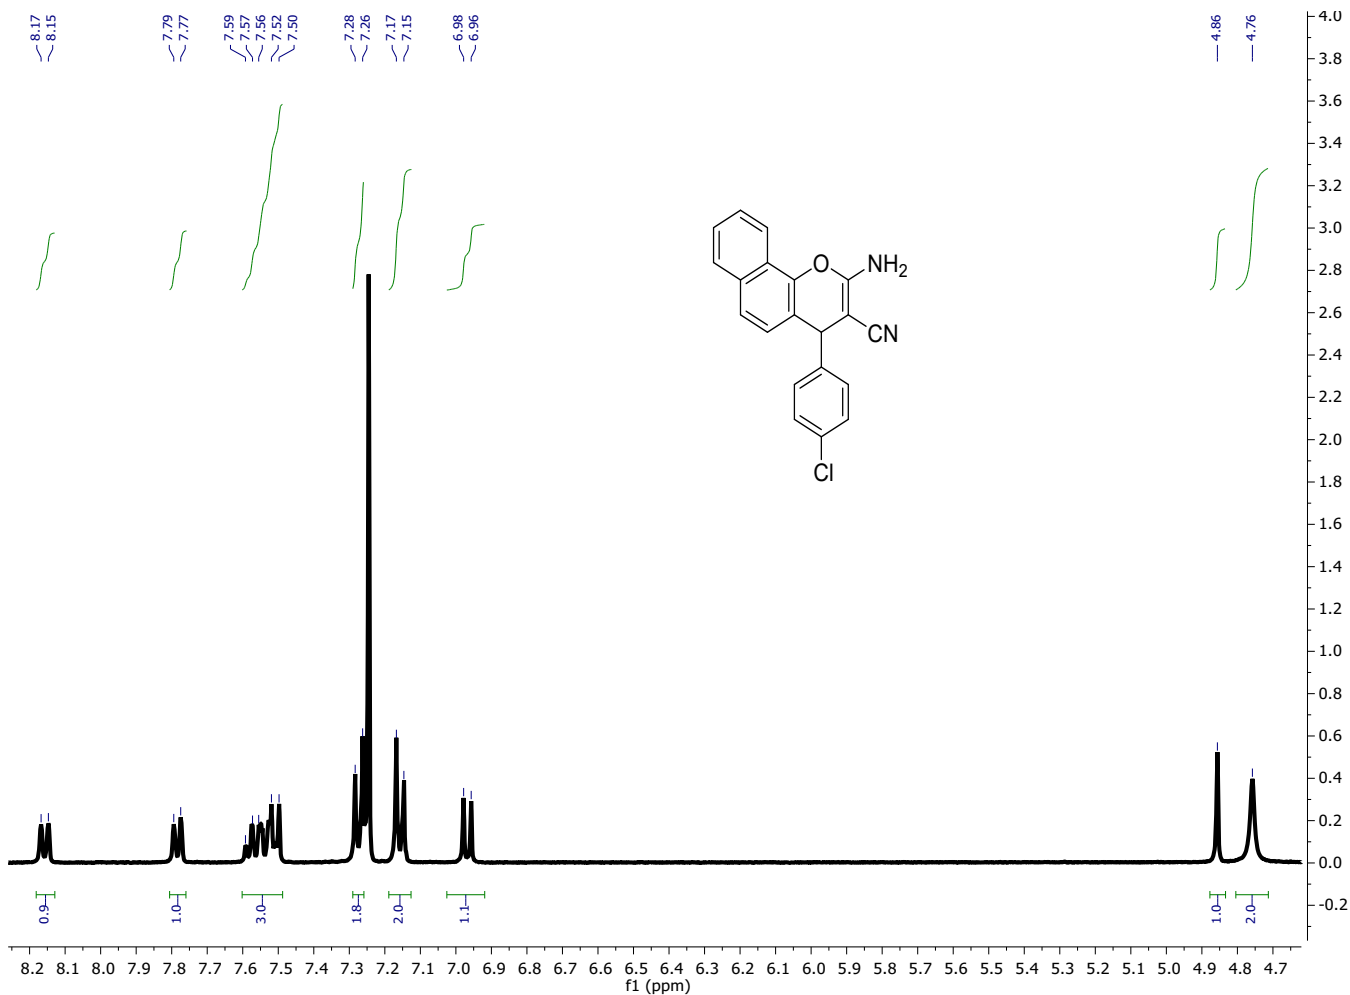

Test Name : HRMS-1  
 070319-MN-NAP-4-Cl 15 (0.157) AM2 (Ar,22000.0,0.00,0.00); Cm (15:19)

1: TOF MS ES+  
 2.48e+007

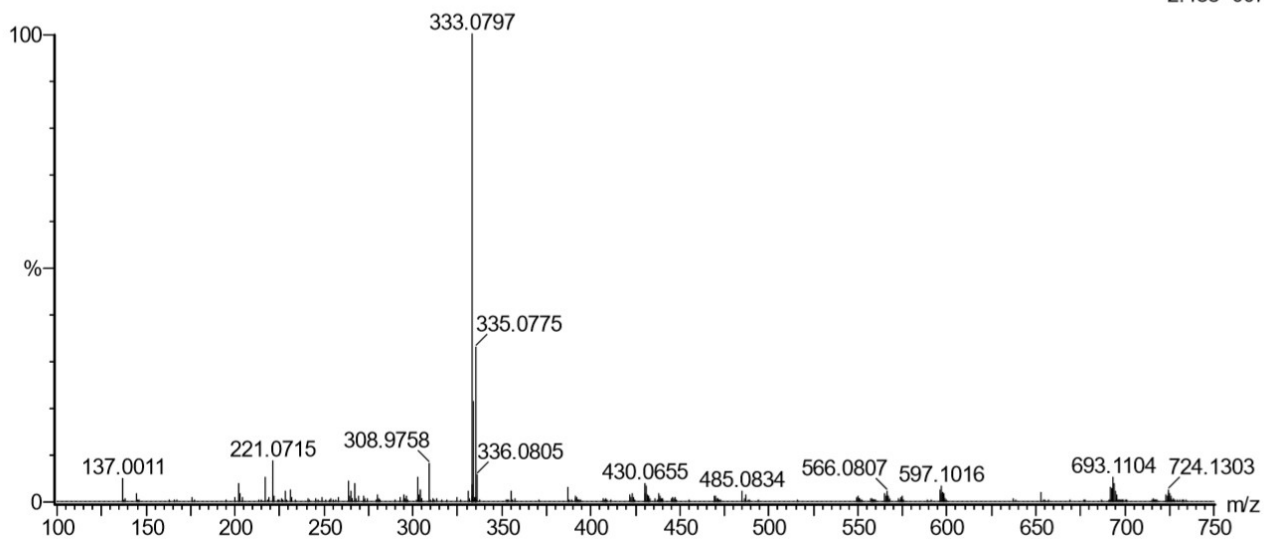

Minimum: -1.5  
 Maximum: 5.0 10.0 50.0

| Mass     | Calc. Mass | mDa | PPM | DBE  | i-FIT | Norm | Conf (%) | Formula                                             |
|----------|------------|-----|-----|------|-------|------|----------|-----------------------------------------------------|
| 333.0797 | 333.0795   | 0.2 | 0.6 | 14.5 | 706.3 | n/a  | n/a      | C <sub>20</sub> H <sub>14</sub> N <sub>2</sub> O Cl |

Figure SF14. <sup>1</sup>H NMR and HRMS of MNC-11 used in the study, (For HRMS m/z: [M+H]<sup>+</sup> calcd for C<sub>20</sub>H<sub>13</sub>ClN<sub>2</sub>O<sup>+</sup> 333.070; found 333.0797)

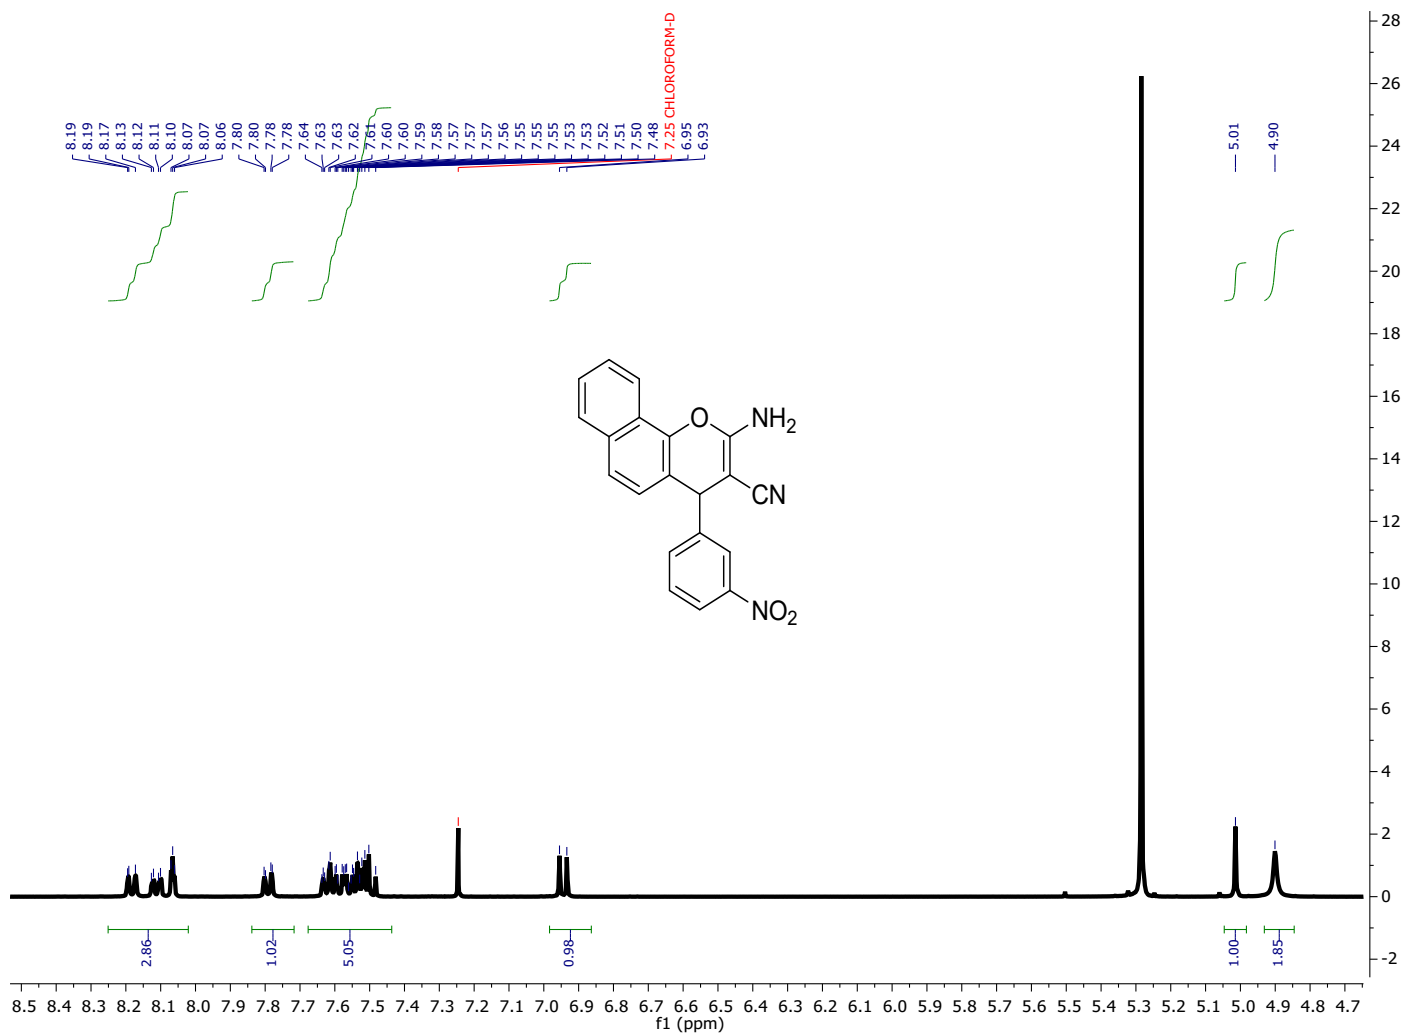

Test Name : HRMS-1  
 070319-MN-2-NO2- 15 (0.157) AM2 (Ar,21000.0,0.00,0.00); Cm (15:18)

1: TOF MS ES+  
 3.06e+007

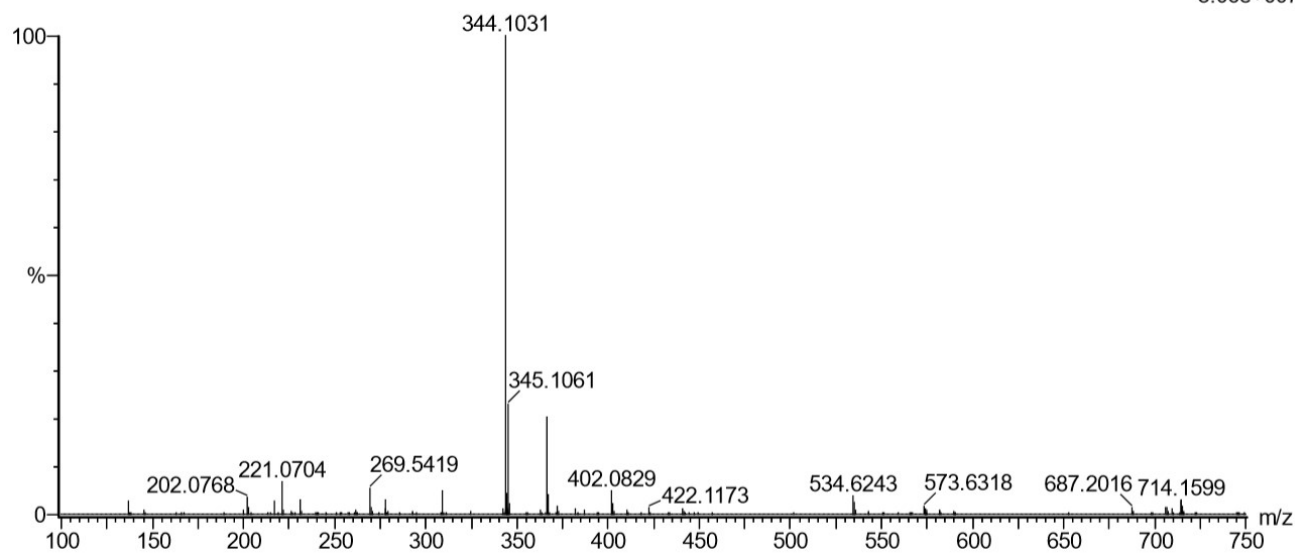

Minimum: -1.5  
 Maximum: 5.0 5.0 50.0

| Mass     | Calc. Mass | mDa  | PPM  | DBE  | i-FIT | Norm | Conf (%) | Formula                                                       |
|----------|------------|------|------|------|-------|------|----------|---------------------------------------------------------------|
| 344.1031 | 344.1035   | -0.4 | -1.2 | 15.5 | 790.5 | n/a  | n/a      | C <sub>20</sub> H <sub>14</sub> N <sub>3</sub> O <sub>3</sub> |

Figure SF15. <sup>1</sup>H NMR of MNC-12 used in the study, (For HRMS m/z: [M+H]<sup>+</sup> calcd for C<sub>20</sub>H<sub>13</sub>N<sub>3</sub>O<sub>3</sub><sup>+</sup> 344.100; found 344.104)

## Crystal growth and structural analysis

The crystals of the compound MNC-10 were grown by slow evaporation technique at ambient temperature. SCXRD experiments of MNC-1 single crystal was performed on a Bruker AXS KAPPA APEX-II CCD diffractometer (Monochromatic Mo K $\alpha$  radiation). Unit cell determination, data collection was done at 296.0 K and data reduction were made using the Bruker APEX-III package. The crystal structures were solved using Olex<sup>2</sup> package equipped with XT<sup>3</sup> and were further refined using XL. Crystal diagram was created using Mercury software. The details of the single-crystal X-ray diffraction data collection, structure solution and refinement are given in Table 1.

**Table ST1:** Crystallographic table of MNC-1

| Data/Salt                                                                                                | MNC-1                                                         |
|----------------------------------------------------------------------------------------------------------|---------------------------------------------------------------|
| <b>Empirical formula</b>                                                                                 | C <sub>20</sub> H <sub>14</sub> N <sub>2</sub> O <sub>2</sub> |
| <b>CCDC number</b>                                                                                       | 2236979                                                       |
| <b>Formula weight</b>                                                                                    | 314.33                                                        |
| <b>Crystal system</b>                                                                                    | Monoclinic                                                    |
| <b>Space group</b>                                                                                       | <i>P</i> 2 <sub>1</sub> / <i>c</i>                            |
| <b>a(Å)</b>                                                                                              | 13.4145(5)                                                    |
| <b>b(Å)</b>                                                                                              | 10.6112(4)                                                    |
| <b>c(Å)</b>                                                                                              | 11.6042(3)                                                    |
| <b><math>\alpha</math>(°)</b>                                                                            | 90                                                            |
| <b><math>\beta</math>(°)</b>                                                                             | 109.3990(10)                                                  |
| <b><math>\gamma</math>(°)</b>                                                                            | 90                                                            |
| <b>V(Å<sup>3</sup>)</b>                                                                                  | 1558.01(9)                                                    |
| <b>Z</b>                                                                                                 | 4                                                             |
| <b><math>\rho_{\text{calc}}</math>(g/cm<sup>-3</sup>)</b>                                                | 1.340                                                         |
| <b>Temperature (K)</b>                                                                                   | 296.0(2)                                                      |
| <b><math>\mu</math>/ mm<sup>-1</sup></b>                                                                 | 0.088                                                         |
| <b>2<math>\theta_{\text{min, max}}</math> (°)</b>                                                        | 5.01 to 56.694                                                |
| <b>F (000)</b>                                                                                           | 656.0                                                         |
| <b><math>h_{\text{min,max}}</math>; <math>k_{\text{min,max}}</math>; <math>l_{\text{min,max}}</math></b> | -17, 17; -14, 14; -15, 15                                     |
| <b>Total no. of reflections</b>                                                                          | 40495                                                         |
| <b>R<sub>int</sub></b>                                                                                   | 0.0494                                                        |
| <b>No. of unique reflections</b>                                                                         | 3883                                                          |
| <b>R<sub>1</sub> [I&gt;2<math>\sigma</math>(I)]</b>                                                      | 0.0472                                                        |
| <b>wR2 (all data)</b>                                                                                    | 0.1232                                                        |
| <b>GooF on F<sup>2</sup></b>                                                                             | 1.051                                                         |
| <b><math>\Delta\rho_{\text{max,min}}</math>/eÅ<sup>-3</sup></b>                                          | 0.14/-0.23                                                    |

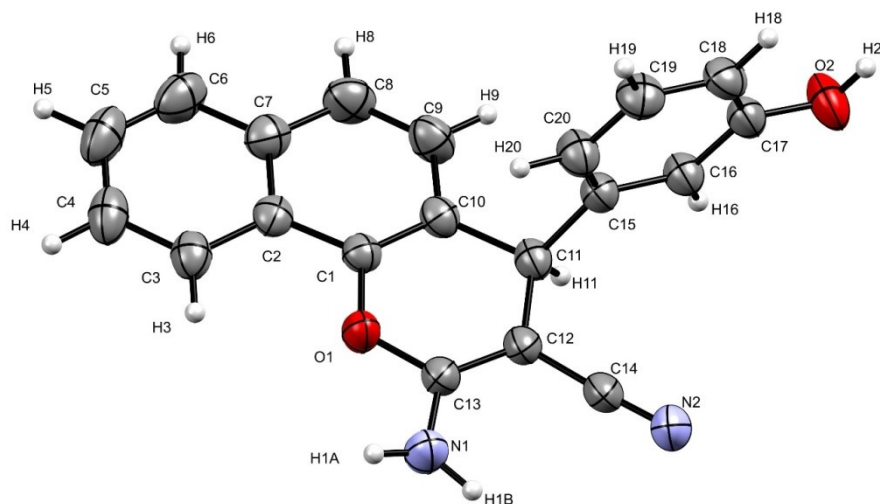

**Figure SF16:** Asymmetric unit of MNC-1 (Thermal ellipsoid probability 50%)

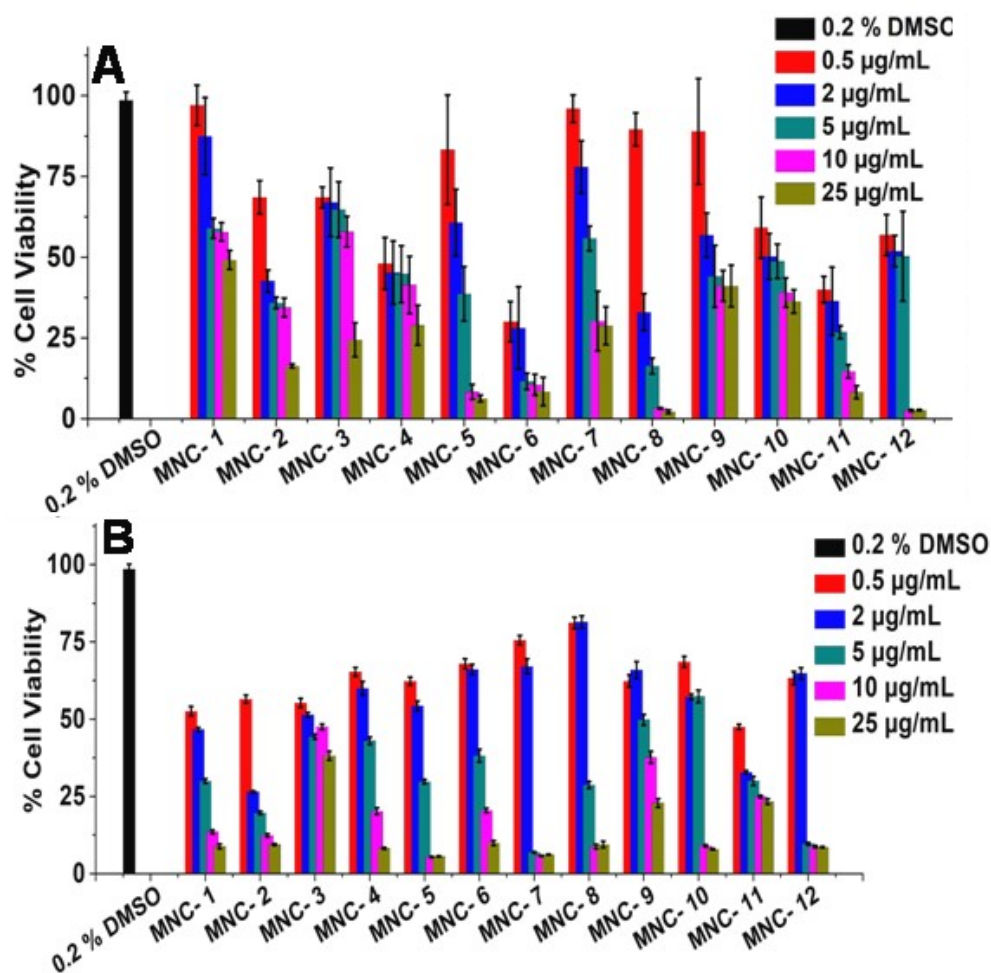

**Figure SF17.** Anticancer activity of chromene derivatives as obtained for HeLa (A) and A549 (B) cancer cell lines.



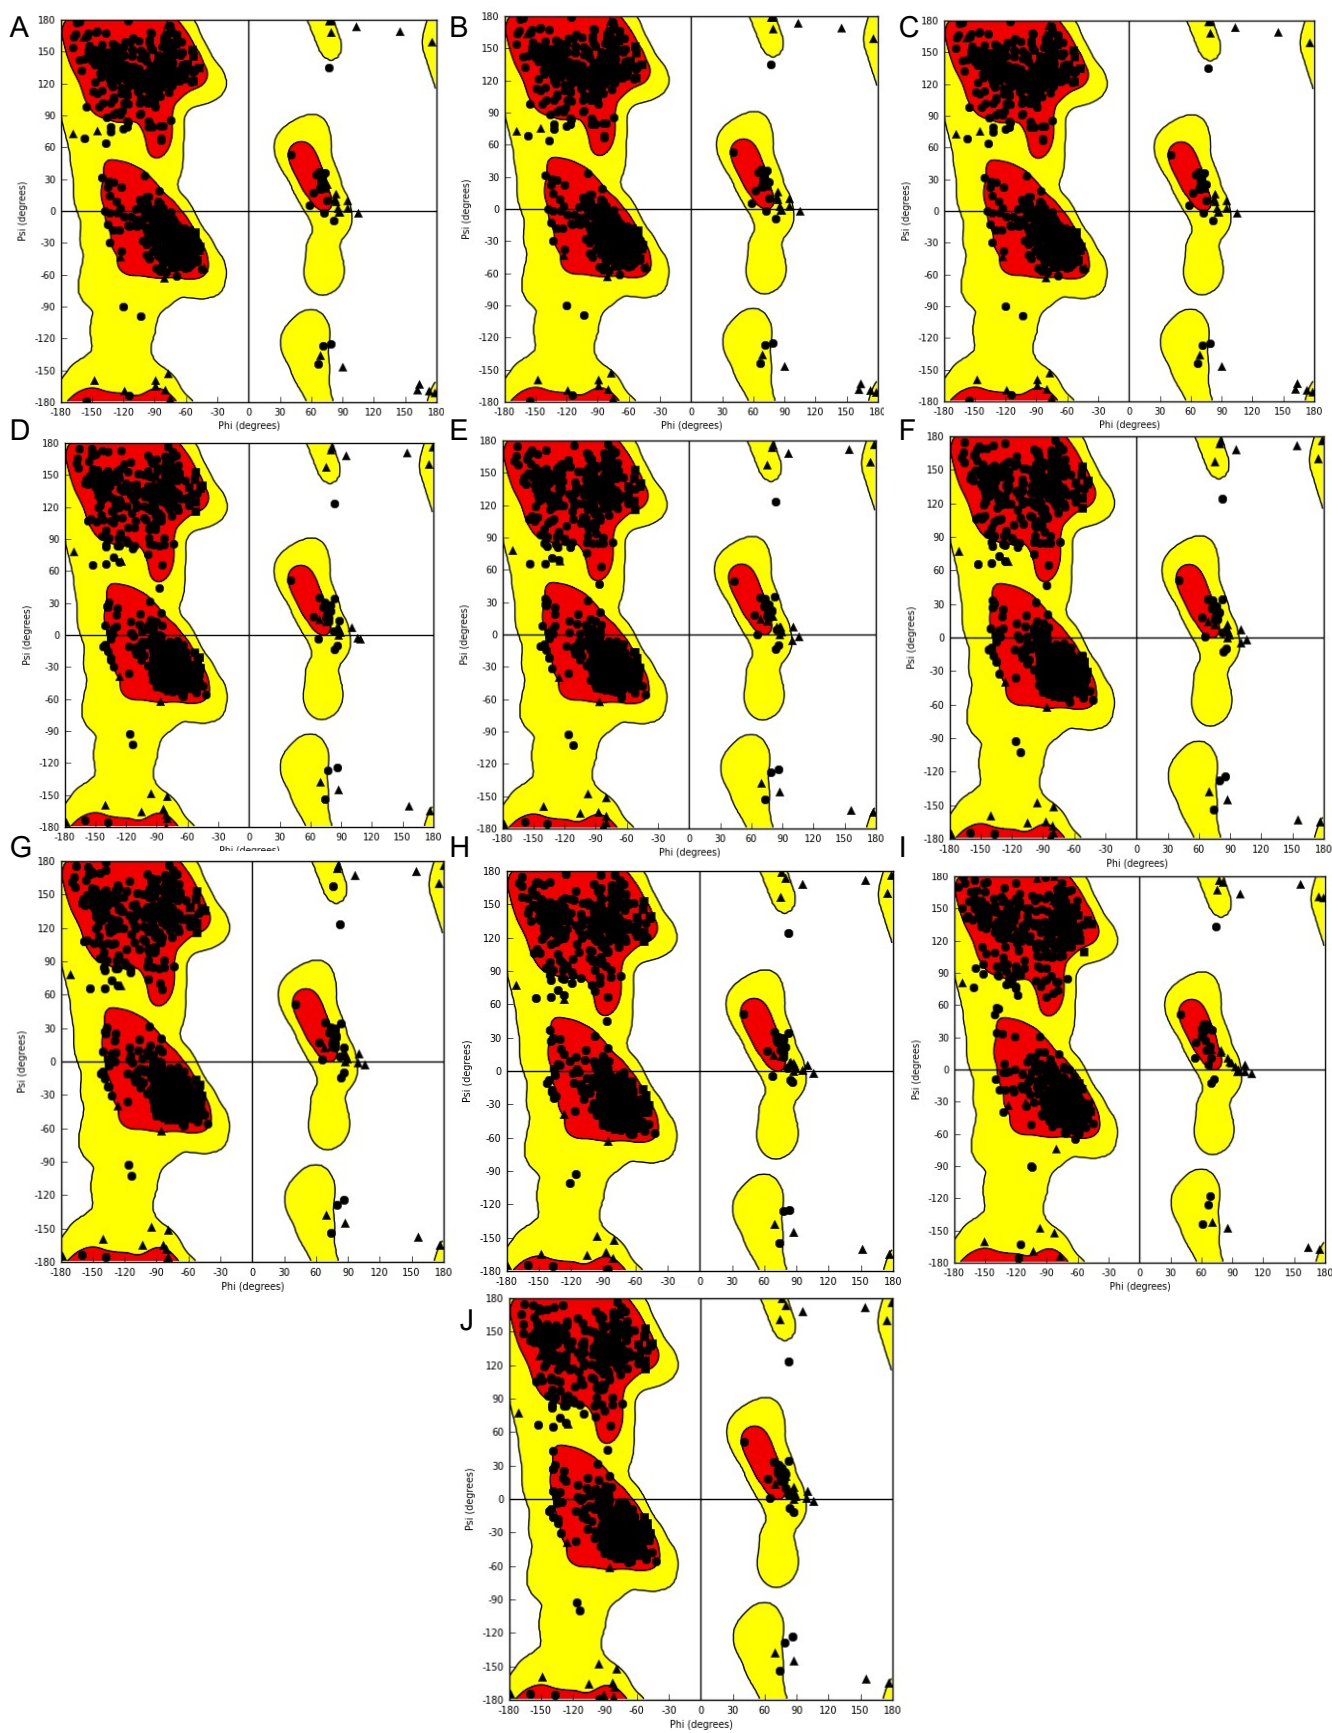

Figure SF18. A-J, Ramachandran plots for microtubule isoform BI, BIIa, BIIb, BIII, BIVa, BIVb, BV, BVI, BVIII, and BVIII respectively.

Table ST2: Ramachandran plot analysis revealing the percentage of total amino acid residues present in favorable, allowed, and outlier regions in the case of all the ten isoforms.

| S. No | Isoform | Residues Percentage |                |                 |
|-------|---------|---------------------|----------------|-----------------|
|       |         | Favorable region    | Allowed Region | Outliers region |
| 1     | BI      | 97.8%               | 1.8%           | 0.3%            |
| 2     | BIIa    | 97.7%               | 2.0%           | 0.3%            |
| 3     | BIIb    | 97.7%               | 2.0%           | 0.3%            |
| 4     | BIII    | 96.4%               | 3.1%           | 0.5%            |
| 5     | BIVa    | 96.4%               | 3.1%           | 0.5%            |
| 6     | BIVb    | 96.7%               | 2.9%           | 0.5%            |
| 7     | BV      | 96.5%               | 3.0%           | 0.5%            |
| 8     | BVI     | 96.3%               | 3.3%           | 0.3%            |
| 9     | BVII    | 97.0%               | 2.8%           | 0.2%            |
| 10    | BVIII   | 96.7%               | 3.0%           | 0.3%            |

Table ST3: Binding position of all the studied molecules in the case of tubulin isoforms.

| CODE   | R/S Configuration | S/D* Binding pattern compounds against each isoform |      |      |      |      |      |    |     |      |       |
|--------|-------------------|-----------------------------------------------------|------|------|------|------|------|----|-----|------|-------|
|        |                   | BI                                                  | BIIA | BIIf | BIII | BIVa | BIVb | BV | BVI | BVII | BVIII |
| MNC-1  | R                 | S                                                   | S    | D    | S    | S    | S    | S  | S   | S    | S     |
|        | S                 | D                                                   | S    | D    | S    | S    | D    | S  | D   | D    | D     |
| MNC-2  | R                 | S                                                   | D    | S    | S    | S    | S    | S  | S   | D    | D     |
|        | S                 | S                                                   | S    | D    | D    | S    | S    | S  | S   | S    | S     |
| MNC-3  | R                 | D                                                   | D    | S    | D    | S    | D    | S  | S   | S    | S     |
|        | S                 | S                                                   | S    | D    | D    | S    | S    | D  | S   | S    | D     |
| MNC-4  | R                 | D                                                   | D    | S    | D    | S    | S    | D  | S   | D    | S     |
|        | S                 | D                                                   | D    | S    | S    | S    | S    | S  | S   | S    | S     |
| MNC-5  | R                 | D                                                   | S    | S    | S    | S    | D    | S  | S   | S    | S     |
|        | S                 | S                                                   | S    | S    | S    | S    | S    | S  | S   | S    | S     |
| MNC-6  | R                 | S                                                   | S    | S    | S    | S    | S    | D  | S   | S    | S     |
|        | S                 | D                                                   | D    | S    | S    | S    | S    | D  | S   | S    | S     |
| MNC-7  | R                 | S                                                   | S    | S    | S    | S    | S    | S  | S   | S    | S     |
|        | S                 | S                                                   | S    | D    | S    | S    | S    | D  | S   | S    | S     |
| MNC-8  | R                 | S                                                   | S    | D    | D    | S    | S    | S  | S   | S    | S     |
|        | S                 | D                                                   | S    | D    | D    | D    | D    | D  | D   | S    | D     |
| MNC-9  | R                 | D                                                   | D    | S    | D    | S    | S    | S  | S   | S    | S     |
|        | S                 | D                                                   | D    | S    | S    | S    | S    | S  | S   | S    | S     |
| MNC-10 | R                 | S                                                   | S    | S    | S    | S    | S    | S  | D   | S    | S     |
|        | S                 | S                                                   | S    | S    | D    | S    | S    | D  | D   | S    | D     |
| MNC-11 | R                 | D                                                   | D    | S    | S    | S    | S    | S  | S   | S    | S     |
|        | S                 | S                                                   | S    | S    | S    | S    | S    | D  | S   | S    | S     |
| MNC-12 | R                 | D                                                   | D    | D    | S    | S    | D    | S  | S   | D    | S     |
|        | S                 | S                                                   | D    | D    | S    | S    | D    | D  | D   | S    | D     |

\*S = Binding of compounds at the same site where colchicine binds or some degree of overlapping, D = Binding of compound at the site different from colchicine binding site.

Table ST4: Maximum side-chain RMSF fluctuating residues of MNC-1 bounded microtubule isoforms as obtained from 50 ns of MD simulation studies.

| $\beta 1$     |       | $\beta 2b$    |       | $\beta 2b$    |        | $\beta 3$     |       | $\beta 4a$    |        |
|---------------|-------|---------------|-------|---------------|--------|---------------|-------|---------------|--------|
| Residue Index | RMSF  | Residue Index | RMSF  | Residue Index | RMSF   | Residue Index | RMSF  | Residue Index | RMSF   |
| 873           | 5.11  | 718           | 9.171 | 440           | 8.384  | 440           | 5.896 | 440           | 14.855 |
| 440           | 4.999 | 440           | 6.292 | 439           | 6.022  | 283           | 5.522 | 438           | 12.973 |
| 40            | 4.836 | 722           | 6.048 | 283           | 5.01   | 717           | 5.059 | 439           | 12.648 |
| 282           | 4.227 | 283           | 5.935 | 285           | 4.883  | 40            | 4.88  | 721           | 11.97  |
| 283           | 4.037 | 720           | 5.818 | 438           | 4.515  | 873           | 4.264 | 163           | 11.947 |
| 81            | 3.828 | 723           | 5.66  | 873           | 4.474  | 723           | 4.257 | 718           | 11.704 |
| 163           | 3.697 | 719           | 5.445 | 40            | 4.431  | 718           | 4.247 | 661           | 11.35  |
| 285           | 3.456 | 724           | 5.43  | 870           | 4.274  | 285           | 4.244 | 345           | 11.243 |
| 42            | 3.44  | 721           | 5.123 | 718           | 4.266  | 724           | 4.102 | 720           | 11.158 |
| 84            | 3.435 | 717           | 4.733 | 284           | 4.126  | 282           | 3.996 | 660           | 10.996 |
| $\beta 4b$    |       | $\beta 5$     |       | $\beta 6$     |        | $\beta 7$     |       | $\beta 8$     |        |
| Residue Index | RMSF  | Residue Index | RMSF  | Residue Index | RMSF   | Residue Index | RMSF  | Residue Index | RMSF   |
| 42            | 7.197 | 440           | 6.835 | 440           | 15.136 | 873           | 8.595 | 722           | 7.385  |
| 40            | 6.444 | 283           | 6.127 | 438           | 14.738 | 872           | 6.488 | 723           | 7.305  |
| 43            | 6.195 | 40            | 4.813 | 439           | 14.079 | 283           | 5.982 | 721           | 6.538  |
| 283           | 6.023 | 439           | 4.747 | 349           | 13.993 | 440           | 5.913 | 724           | 6.431  |
| 440           | 5.946 | 41            | 4.681 | 724           | 13.836 | 722           | 5.719 | 1             | 5.488  |
| 41            | 5.304 | 42            | 4.625 | 721           | 13.654 | 718           | 5.115 | 725           | 4.367  |
| 44            | 5.302 | 285           | 4.545 | 720           | 13.547 | 723           | 5.075 | 748           | 4.333  |
| 46            | 5.099 | 438           | 4.528 | 725           | 13.153 | 720           | 4.834 | 718           | 4.068  |
| 724           | 4.61  | 39            | 4.428 | 437           | 13.066 | 439           | 4.625 | 2             | 3.906  |
| 38            | 4.423 | 539           | 4.286 | 660           | 12.709 | 721           | 4.469 | 720           | 3.787  |

## References

1. J. Du, M. Tao and W. Zhang, *ACS Sustain. Chem. Eng.*, 2016, **4**, 4296-4304.
2. M. G. Dekamin and M. Eslami, *Green Chem.*, 2014, **16**, 4914-4921.
3. D. S. Patel, J. R. Avalani and D. K. Raval, *J. Saudi Chem. Soc.*, 2016, **20**, S401-S405.
